# Supplementary material for: MnO2 catalyzed formylation of amines and transamidation of amides under solvent-free conditions
Source: Royal Society of Chemistry journal article supplement (doi:10.1039/c5ra13094h), 2015-01-01

## Supplementary Information

### **MnO<sub>2</sub> catalyzed formylation of amines and transamidation of amides under solvent-free condition**

Subhash L. Yedage,<sup>a</sup> Denver S. D'silva<sup>a</sup> and Bhalchandra M. Bhanage<sup>a,\*</sup>

Department of Chemistry, Institute of Chemical Technology, N. Parekh Marg, Matunga,  
Mumbai, 400 019, India.

E-mail: [bm.bhanage@gmail.com](mailto:bm.bhanage@gmail.com), [bm.bhanage@ictmumbai.edu.in](mailto:bm.bhanage@ictmumbai.edu.in)

Copies of <sup>1</sup>H and <sup>13</sup>C NMR spectra.

2-26

### *N*-phenylformamide (3aa) <sup>1</sup>H NMR

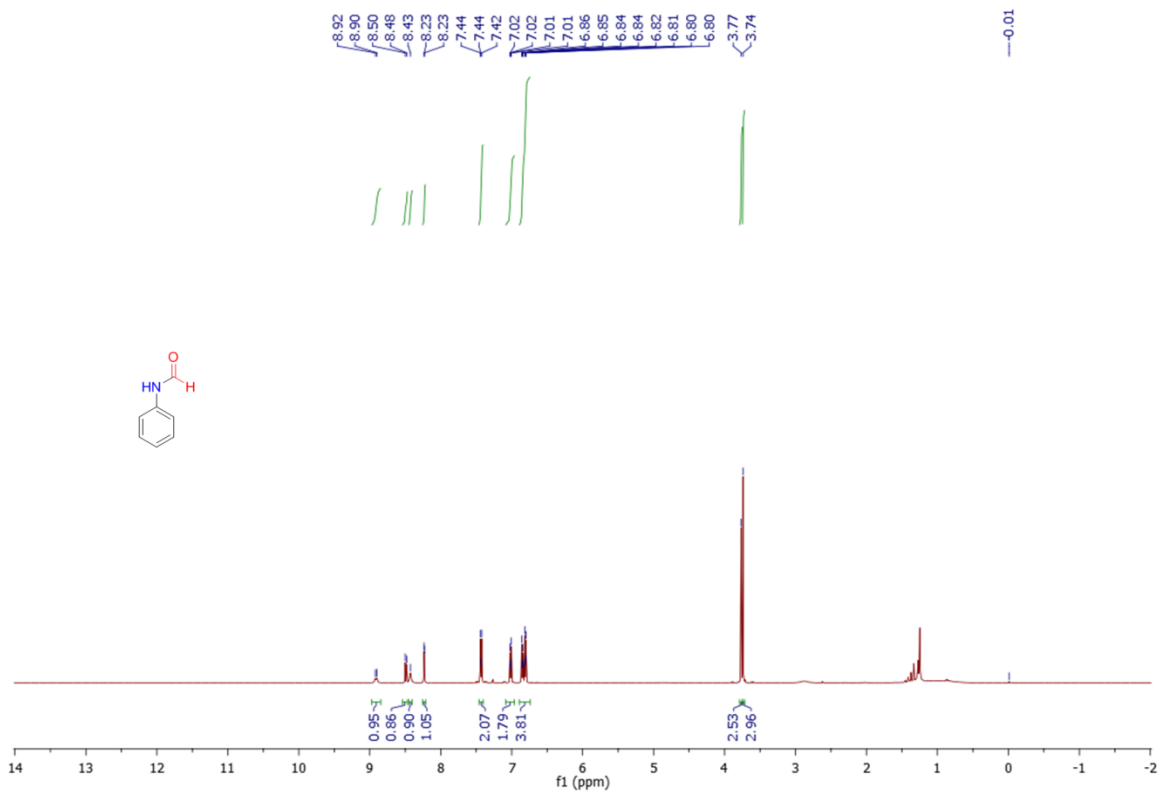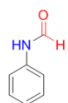

### *N*-(4-methoxyphenyl)formamide (3ba) <sup>1</sup>H NMR

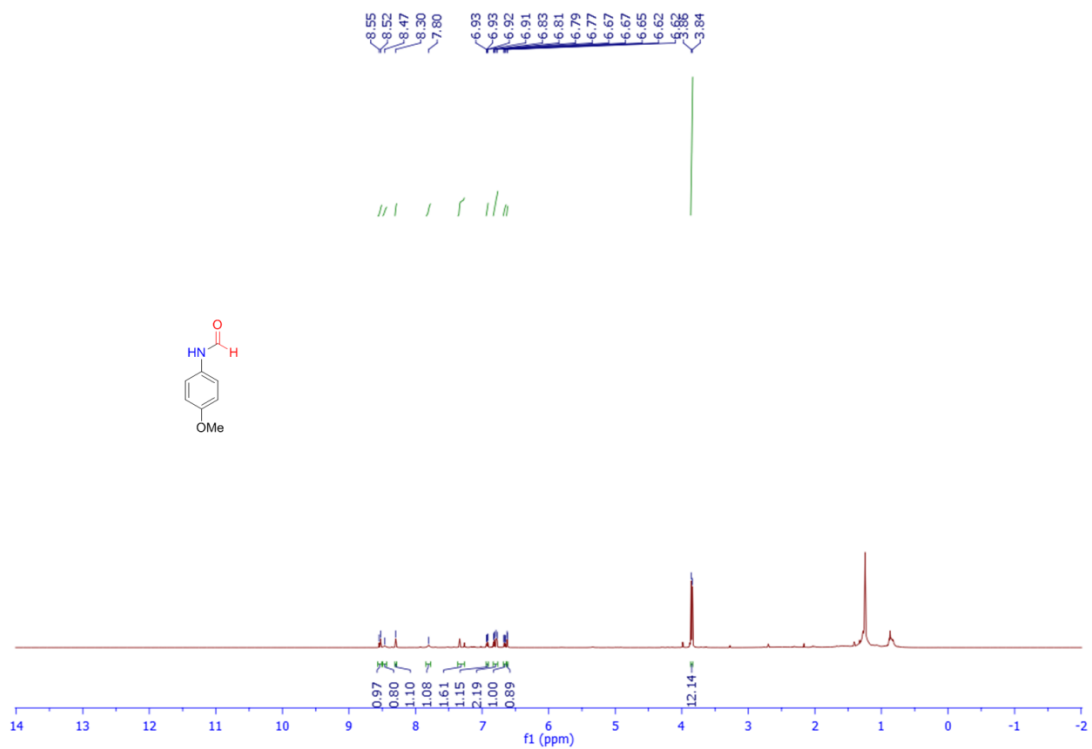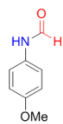

### *N*-(3-methoxyphenyl)formamide (3ca) <sup>1</sup>H NMR

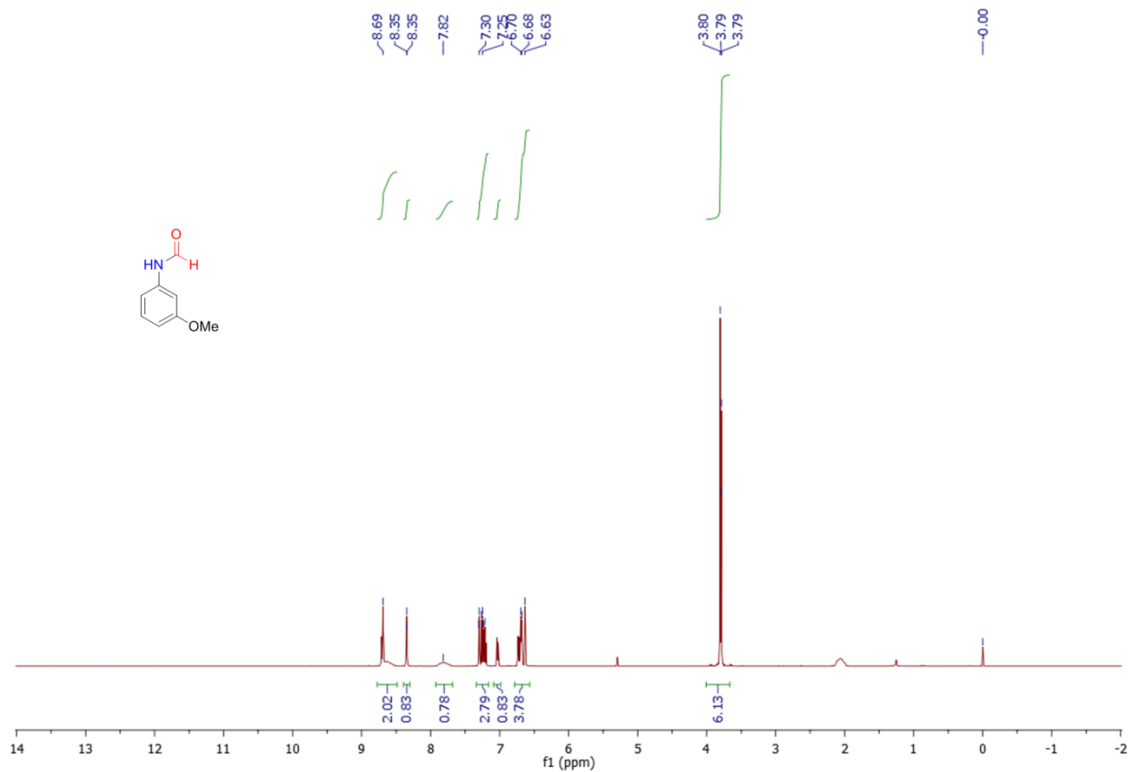

### *N*-(3,4-dimethoxyphenyl)formamide (3da) <sup>1</sup>H NMR

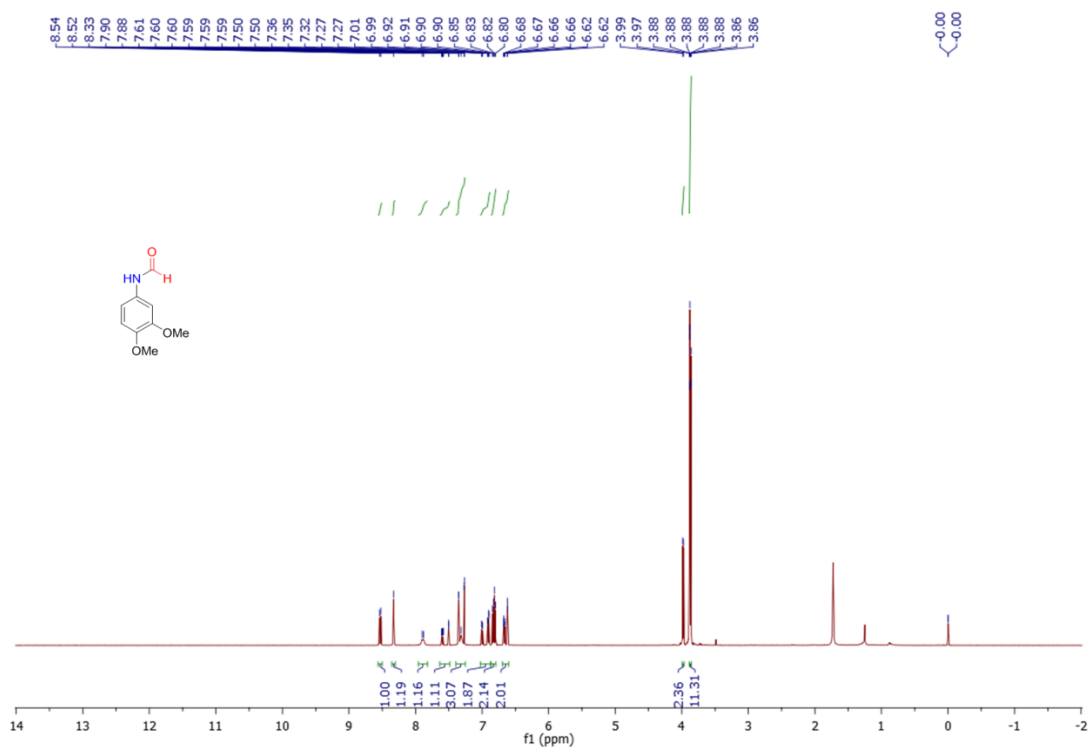

### *N*-(2-methoxyphenyl)formamide (3ea) $^1\text{H}$ NMR

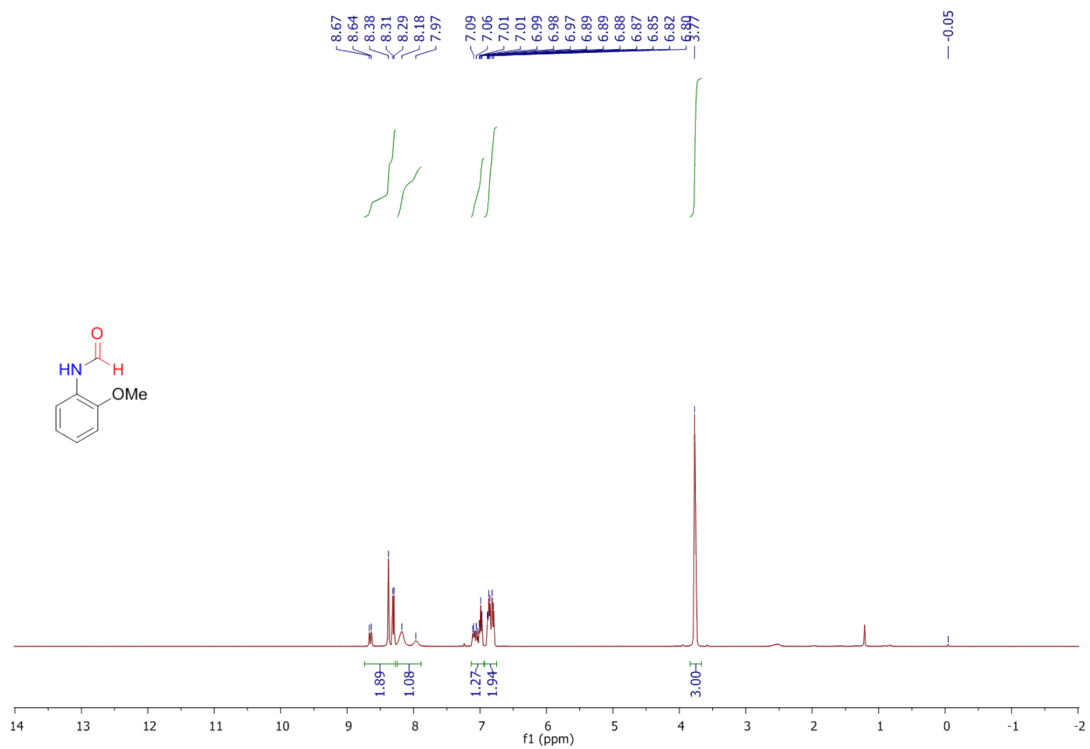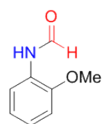

### *N*-(2-methoxyphenyl)formamide (3ea) $^{13}\text{C}$ NMR

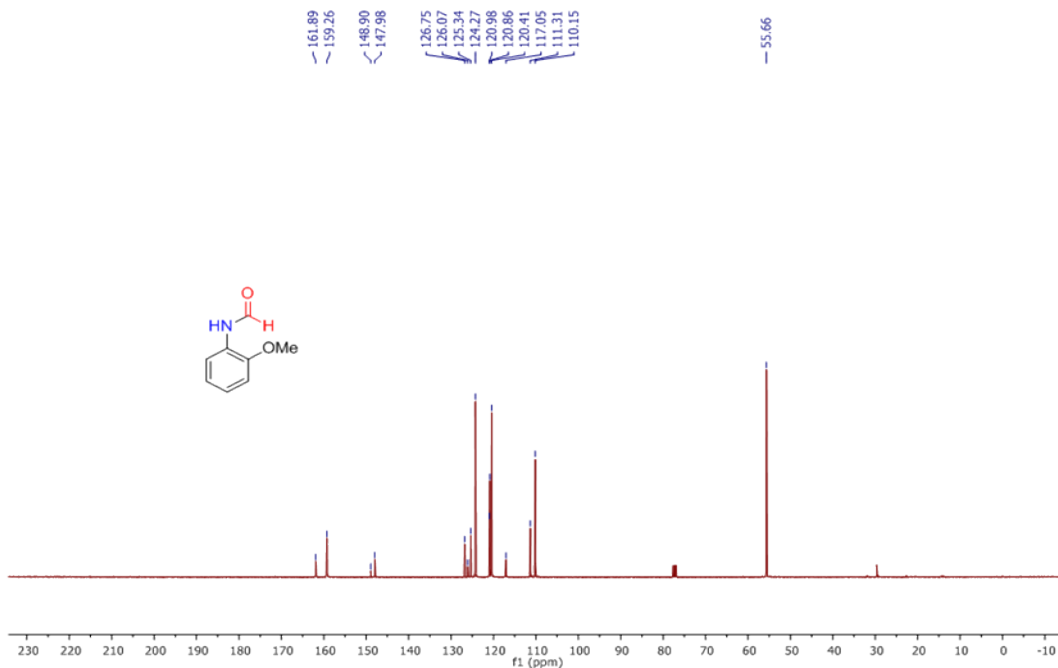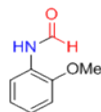

### *N*-mesitylformamide (3fa) $^1\text{H}$ NMR

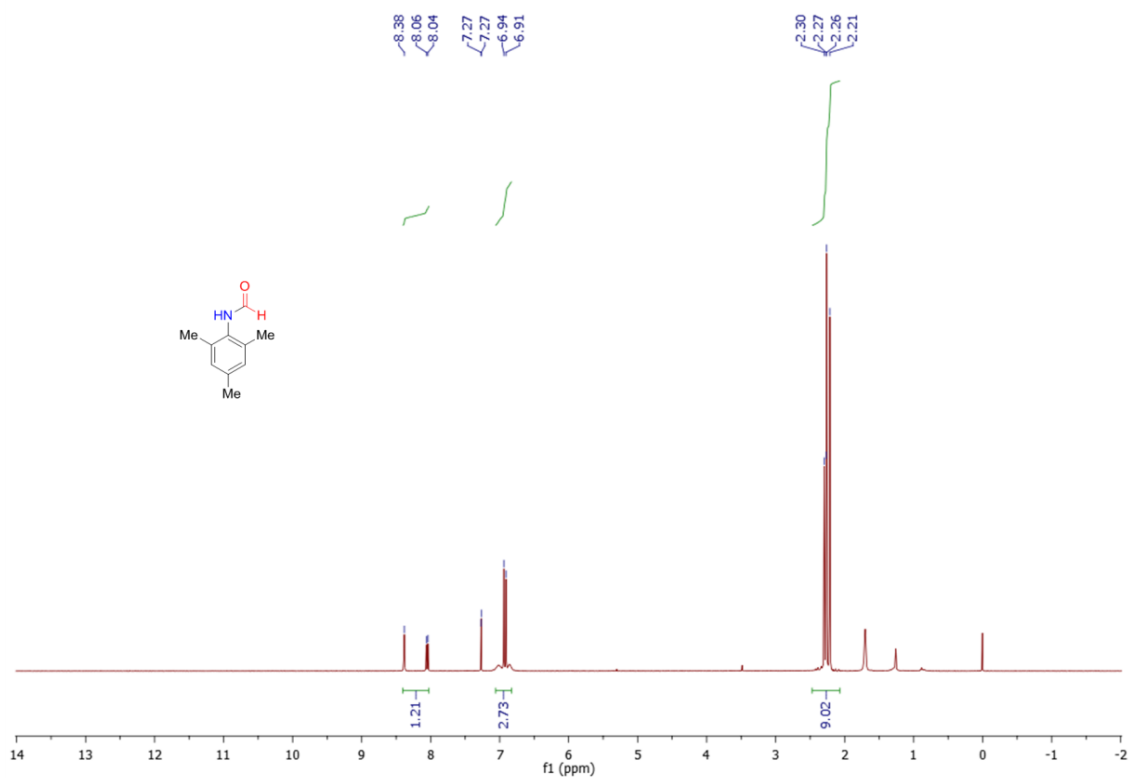

### *N*-(2,6-diethylphenyl)formamide (3ga) $^1\text{H}$ NMR

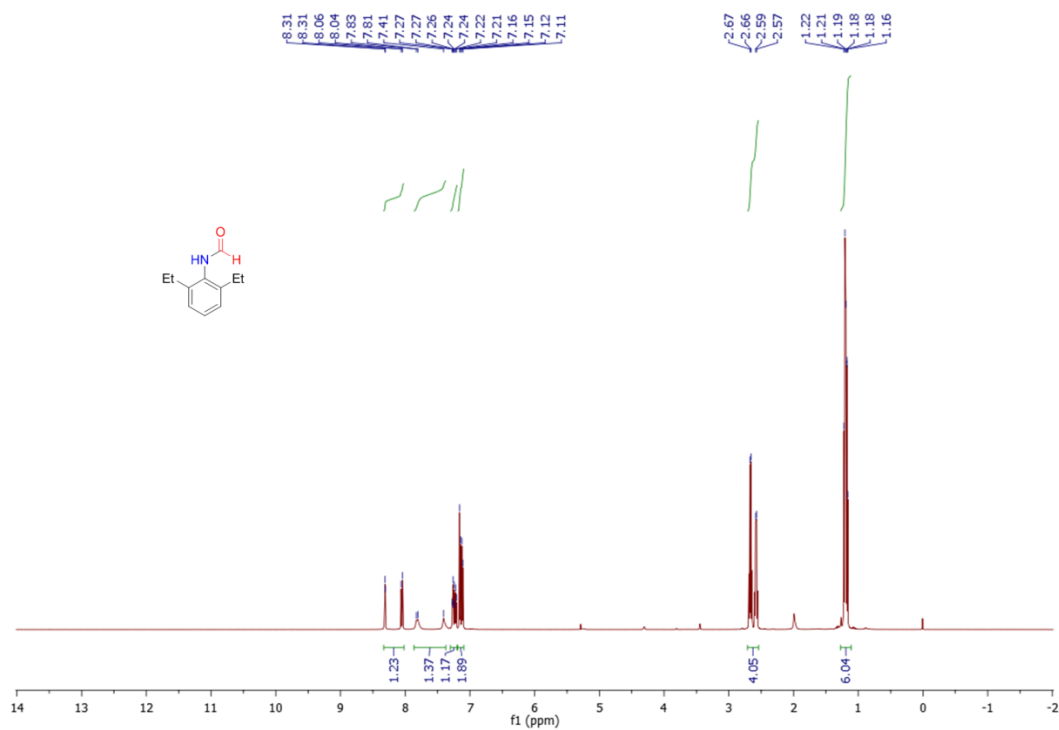

### *N*-(4-(difluoromethoxy)phenyl)formamide (3ha) <sup>1</sup>H NMR

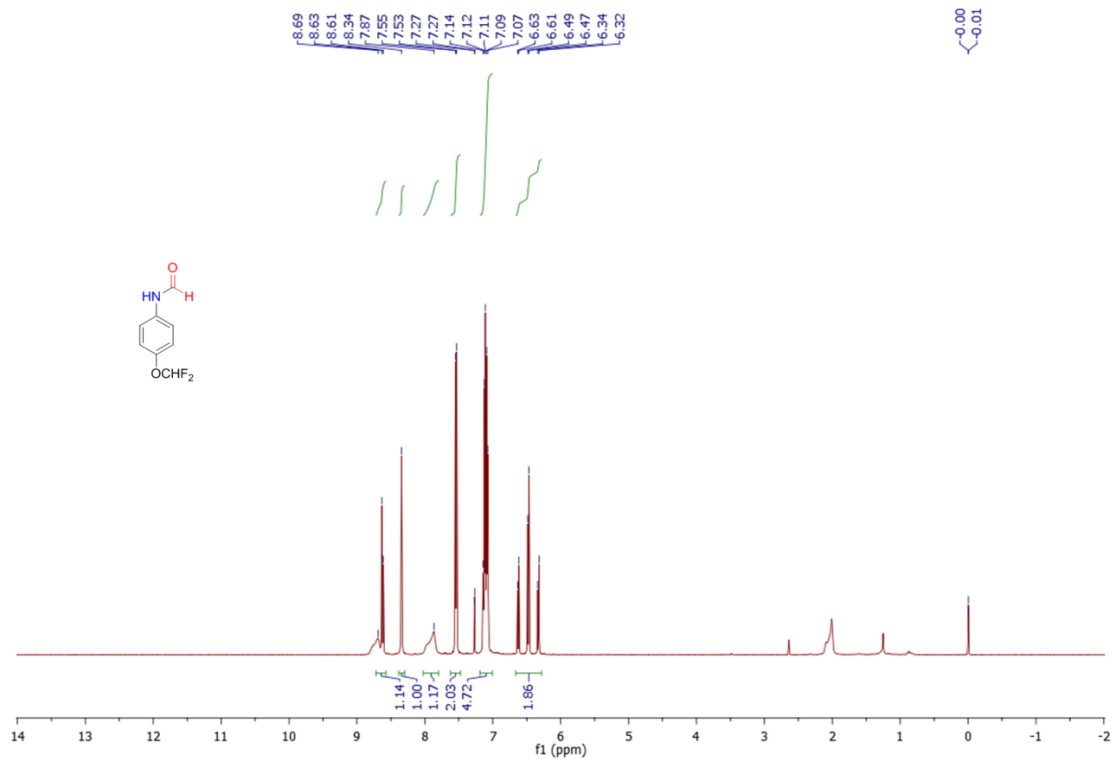

### *N*-(3-bromophenyl)formamide (3ia) <sup>1</sup>H NMR

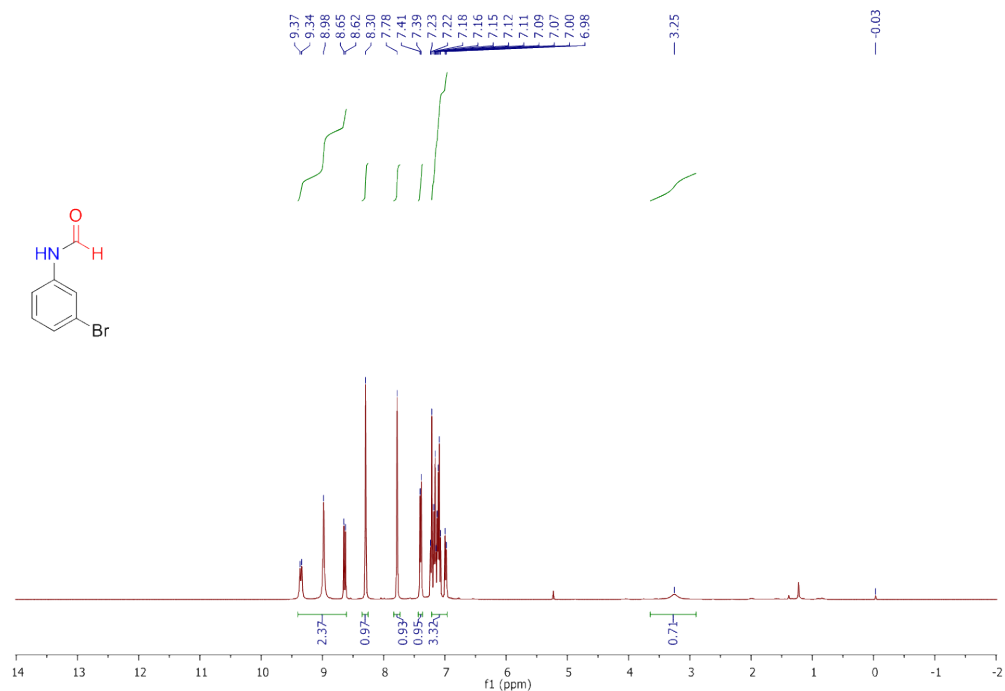

### *N*-(3-bromophenyl)formamide (3ia) <sup>13</sup>C NMR

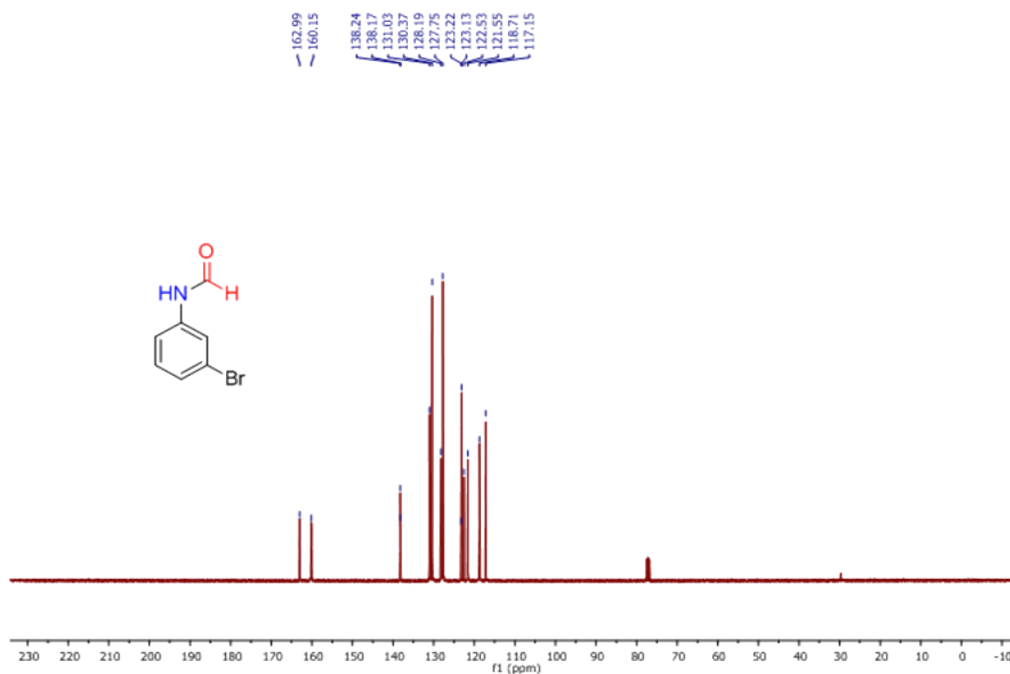

### *N*-(2-fluorophenyl)formamide (3ja) <sup>1</sup>H NMR

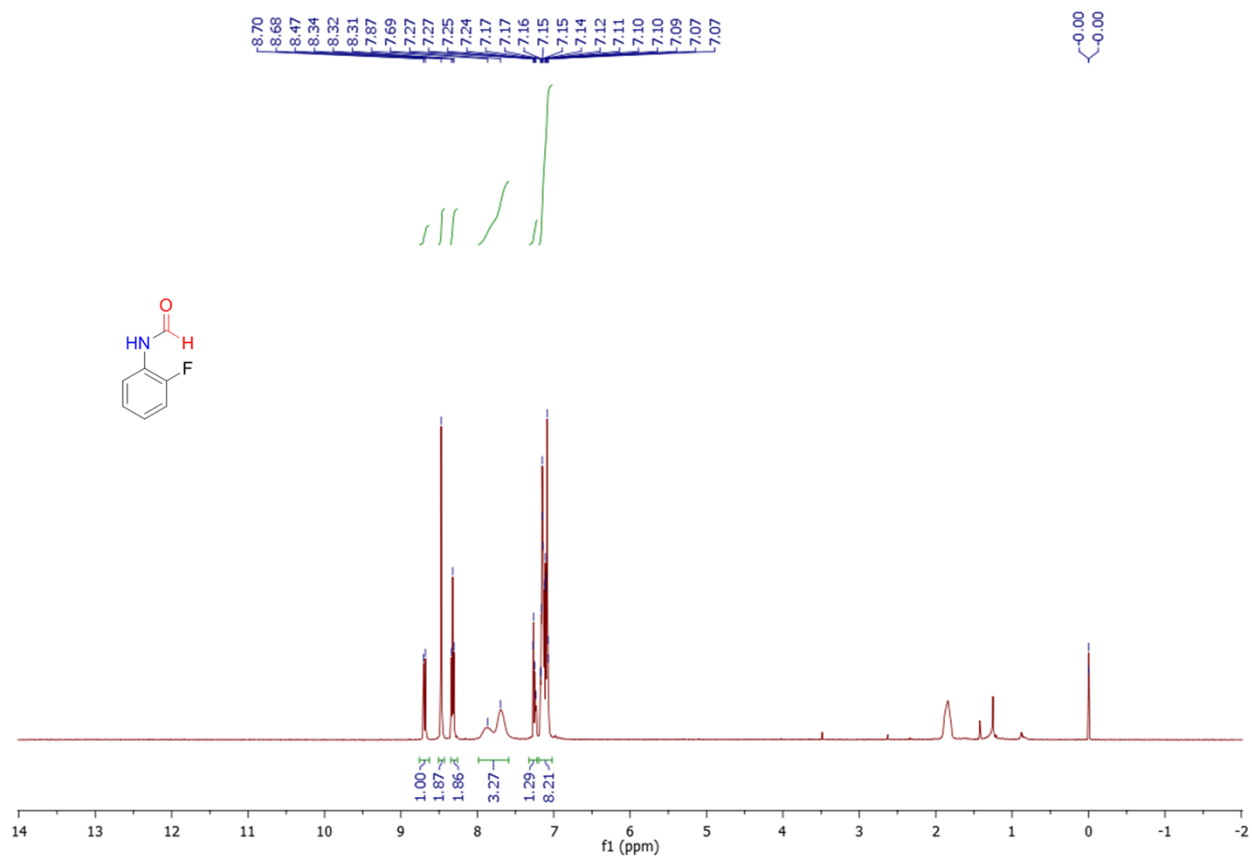

### *N*-benzylbenzamide (6aa) <sup>1</sup>H NMR

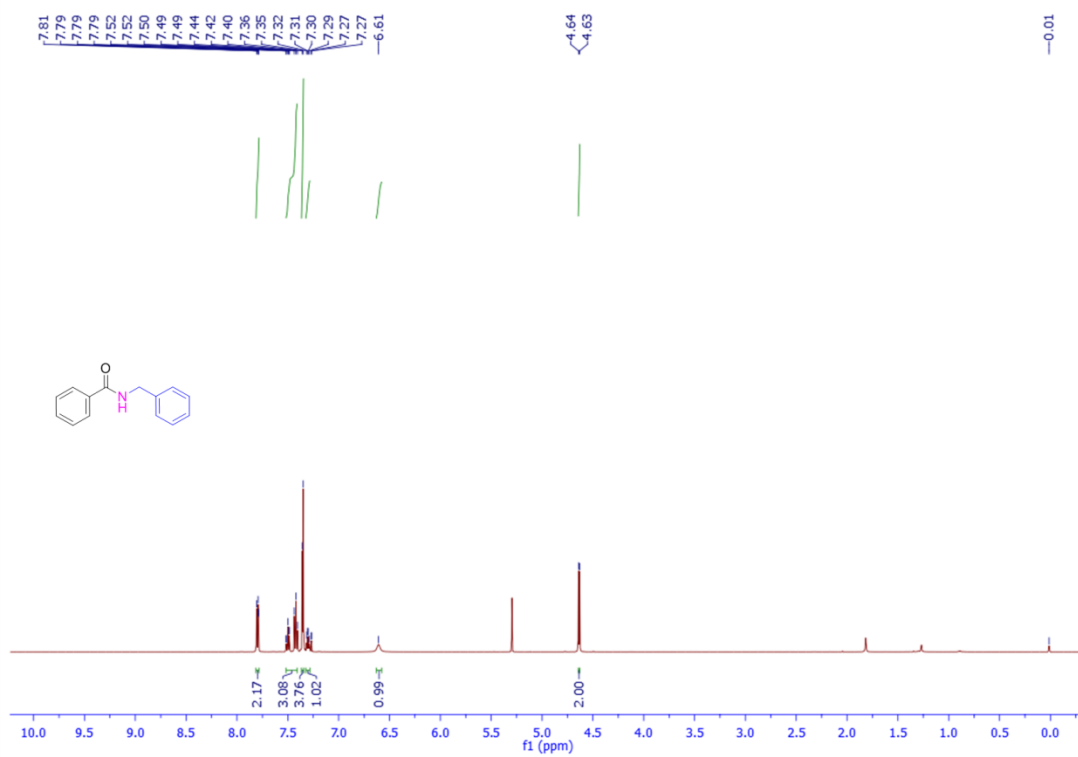

### *N*-benzylbenzamide (6aa) <sup>13</sup>C NMR

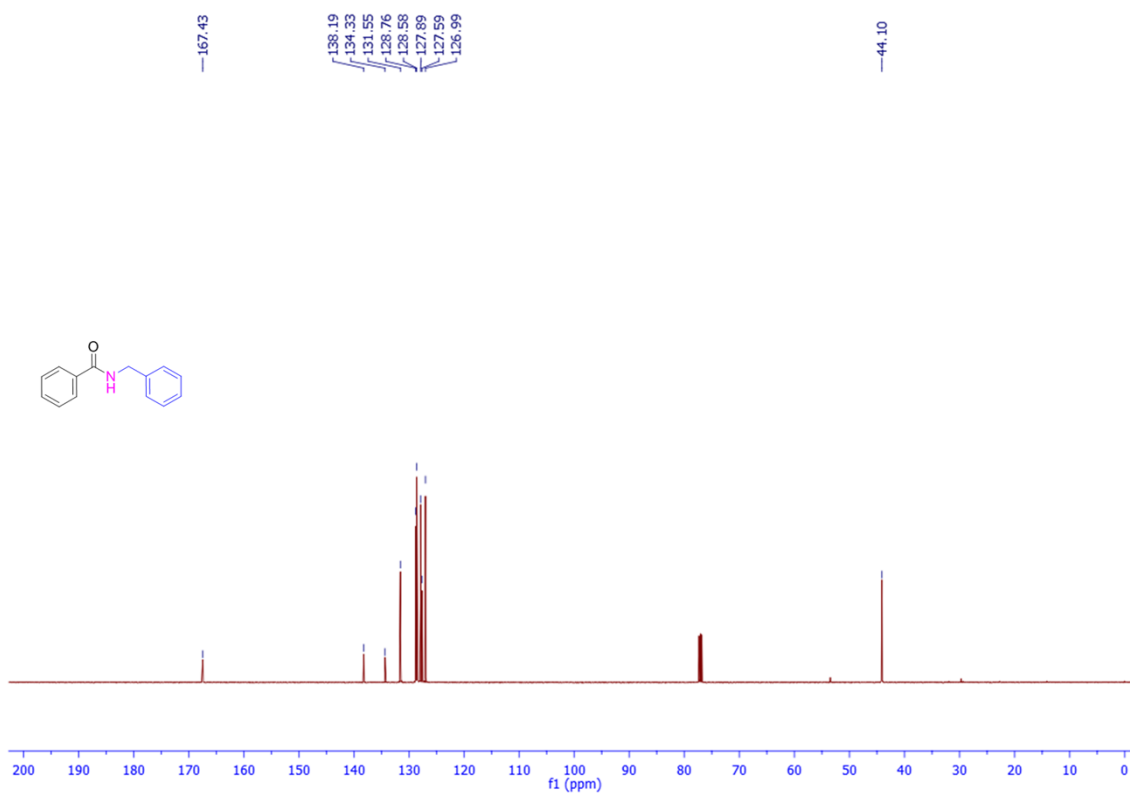



### *N*-benzyl-4-methylbenzamide (6ba) <sup>1</sup>H NMR

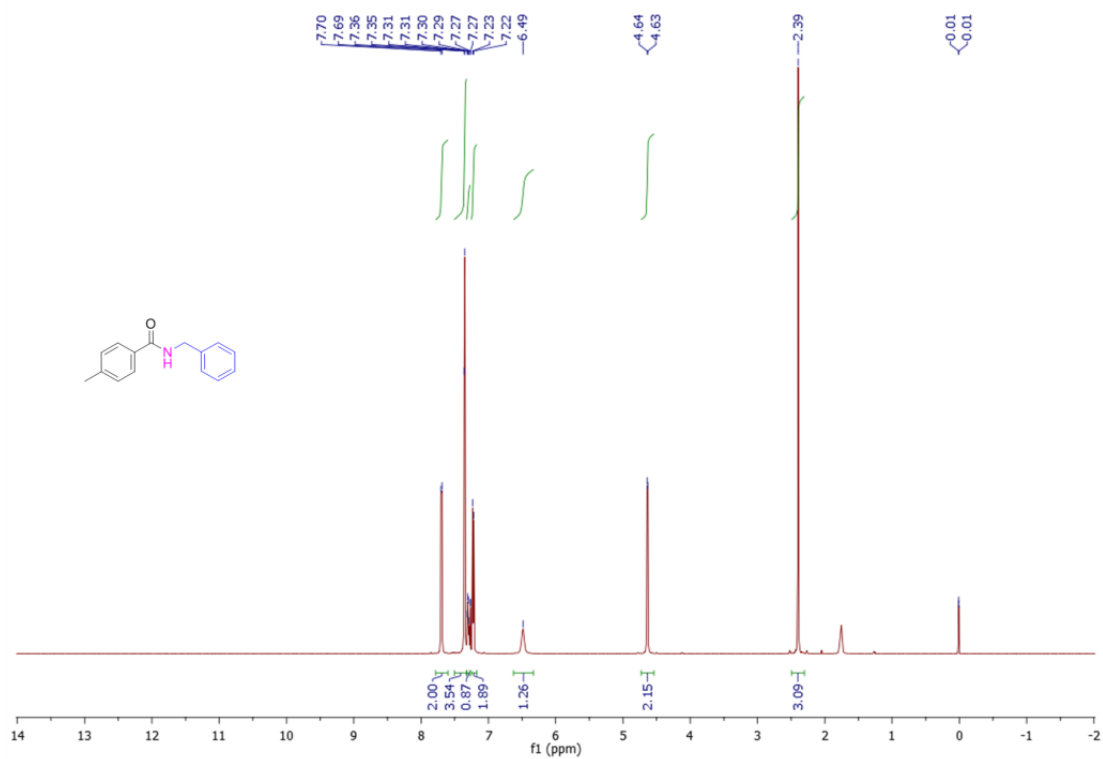

### *N*-benzyl-3-methylbenzamide (6ca) <sup>1</sup>H NMR

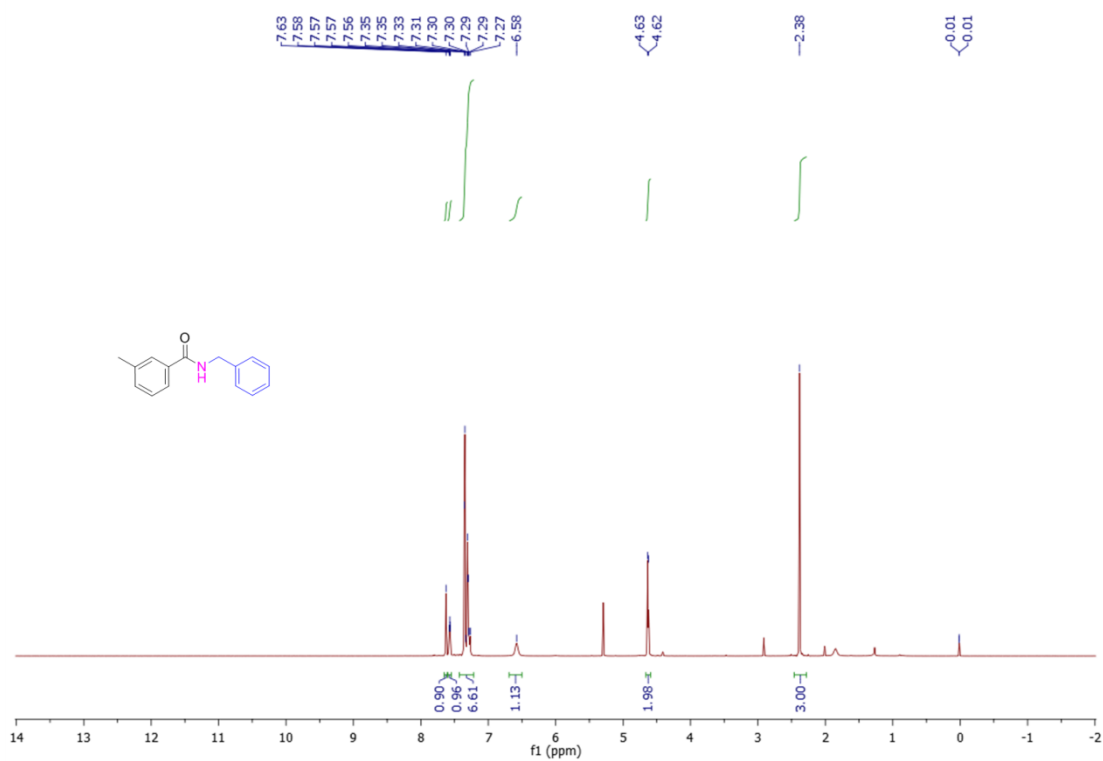

### *N*-benzyl-4-methoxybenzamide (6ea) <sup>1</sup>H NMR

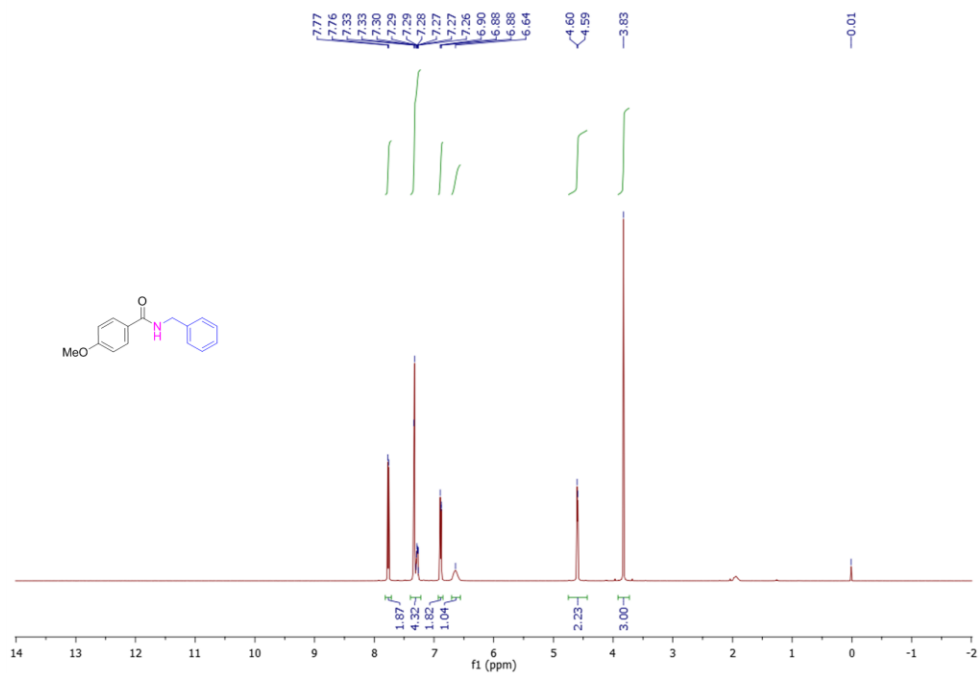

### *N*-benzyl-4-chlorobenzamide (6ga) <sup>1</sup>H NMR

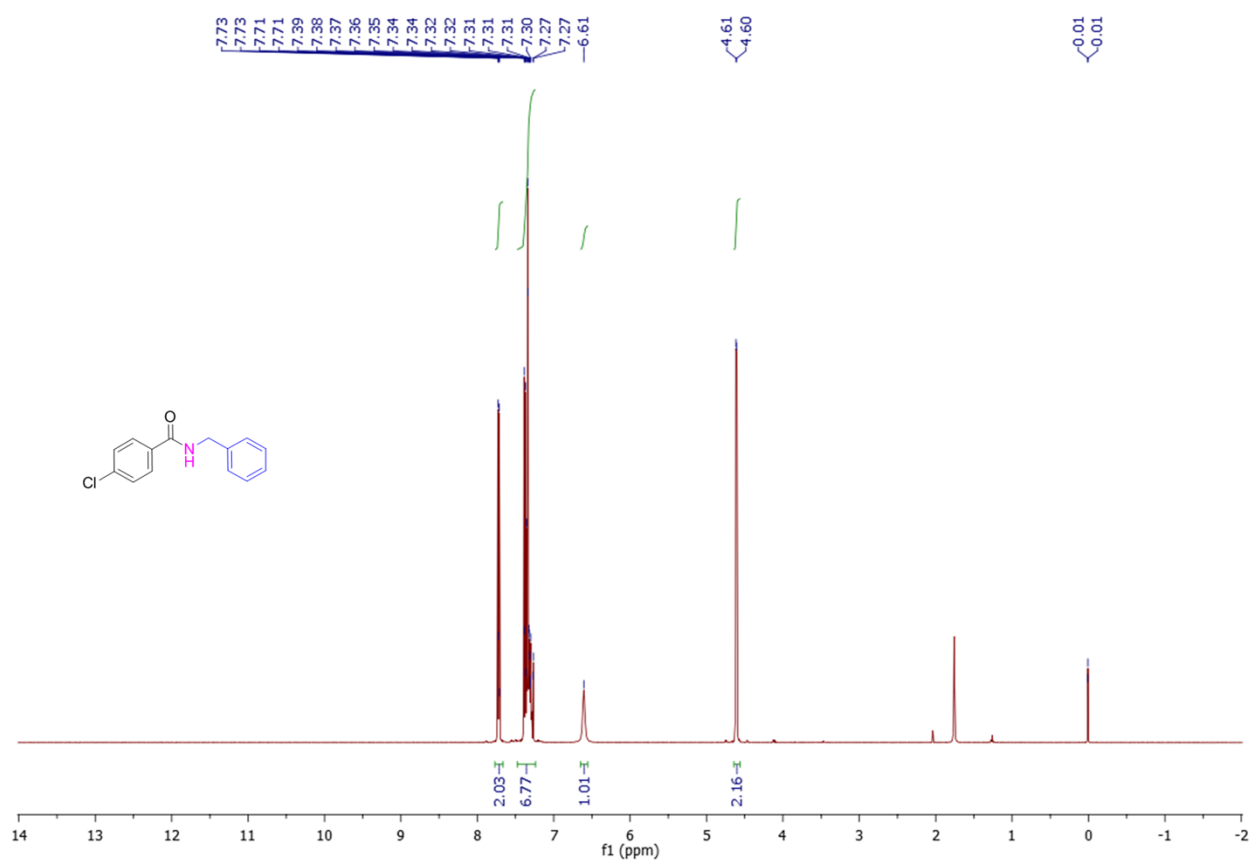

### *N*-benzyl-2-chlorobenzamide (6ha) <sup>1</sup>H NMR

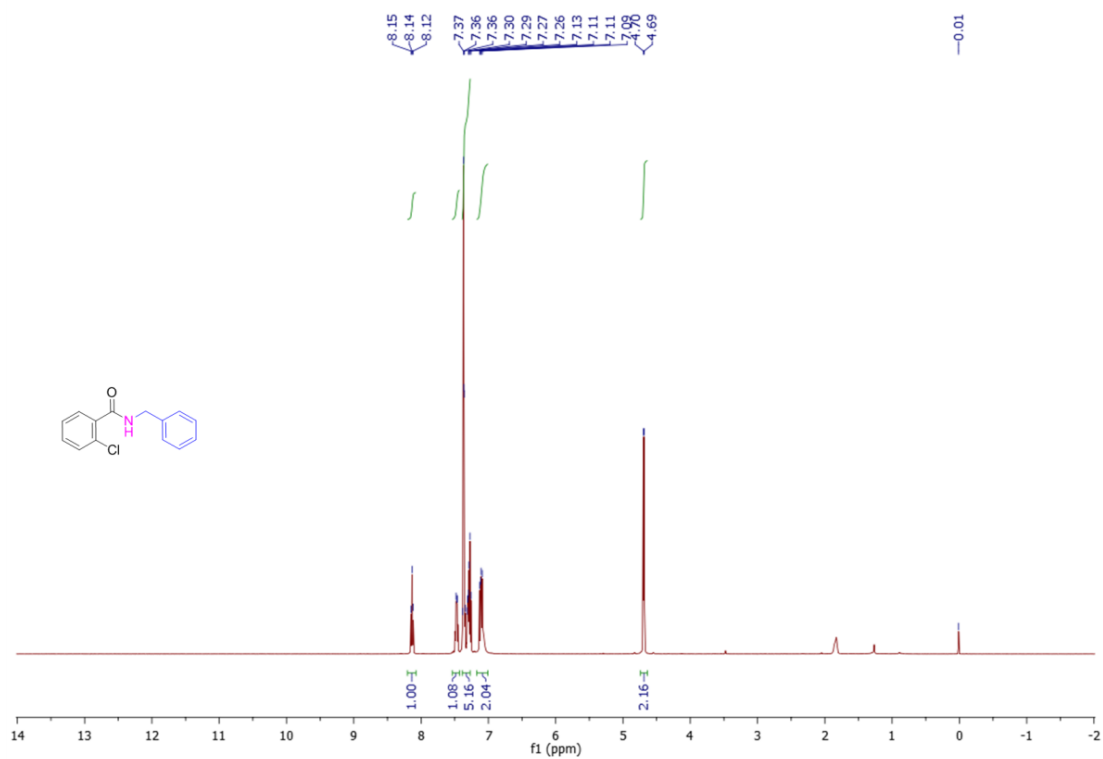

### *N*-benzyl-2-fluorobenzamide (6ia) <sup>1</sup>H NMR

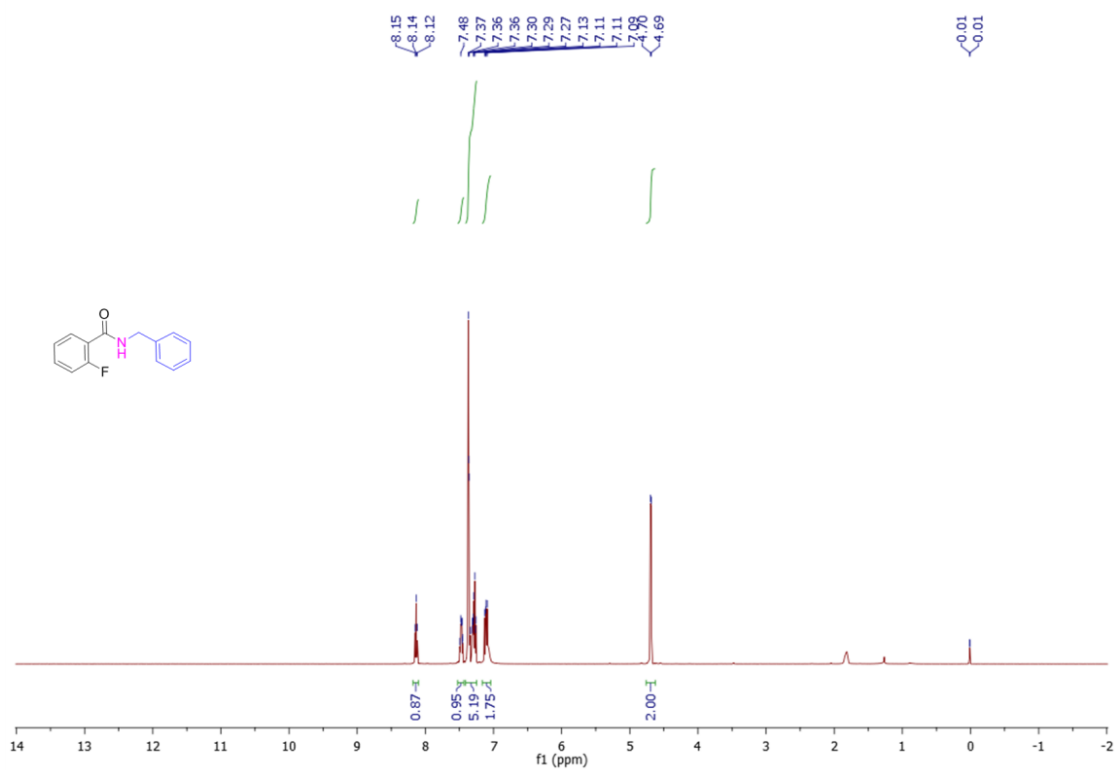

### *N*-benzyl-3,5-dinitrobenzamide (6ka) <sup>1</sup>H NMR

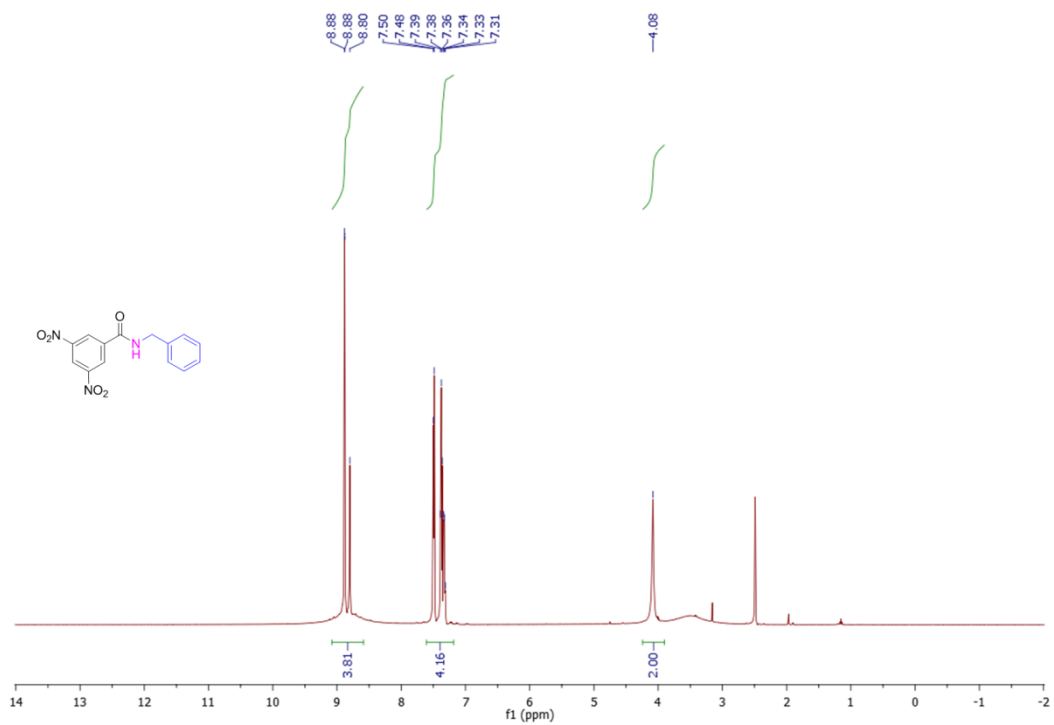

### *N*-benzylacetamide (6la) <sup>1</sup>H NMR

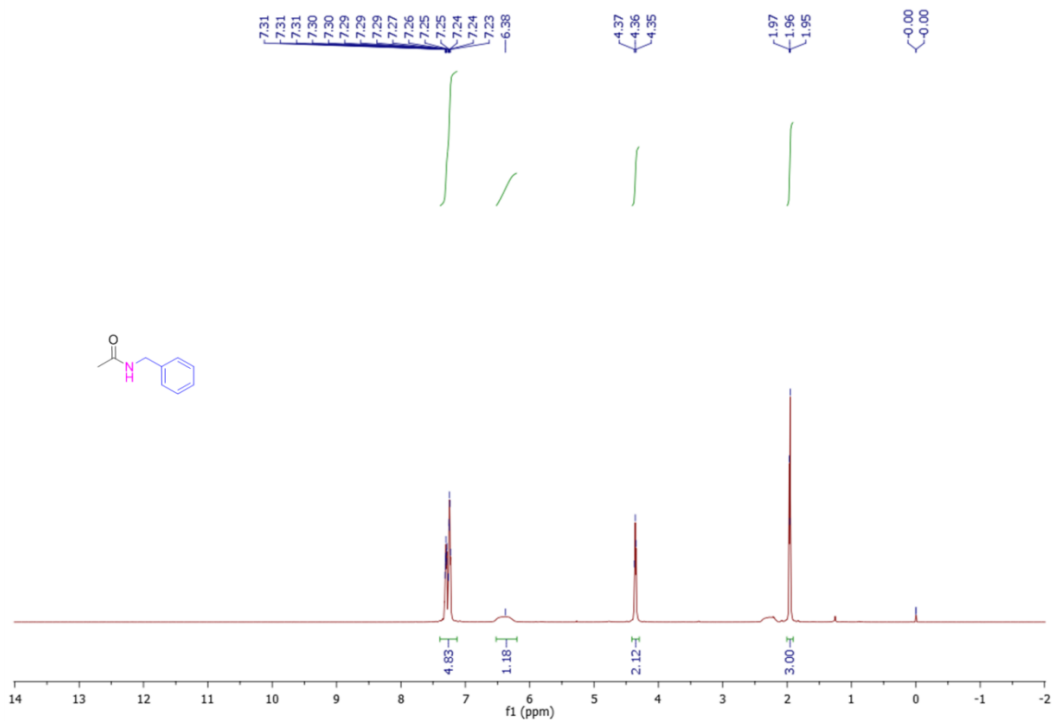

### *N*-(4-methoxybenzyl)benzamide (6ab) <sup>1</sup>H NMR

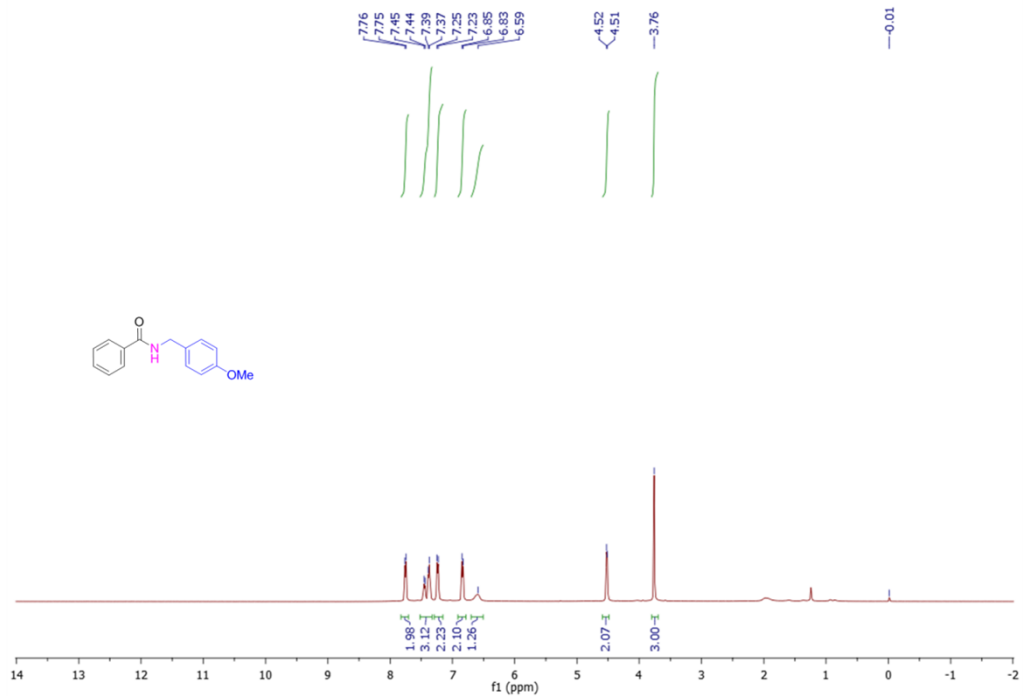

### *N*-(4-methoxybenzyl)benzamide (6ab) <sup>13</sup>C NMR

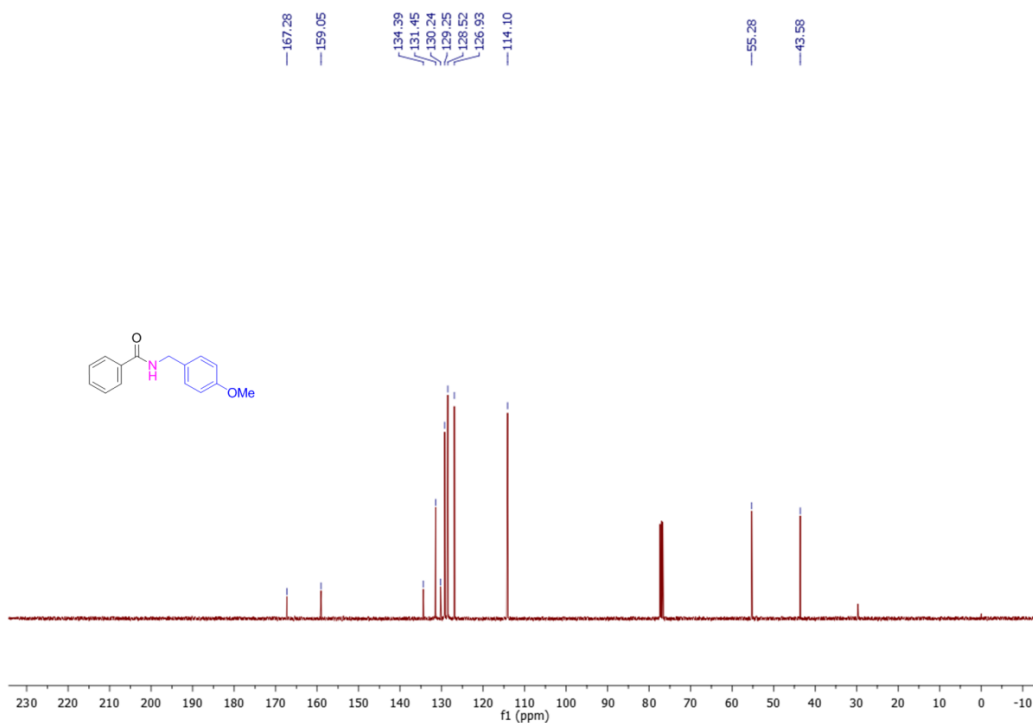

### *N*-(4-(*tert*-butyl)benzyl)benzamide (6ac) <sup>1</sup>H NMR

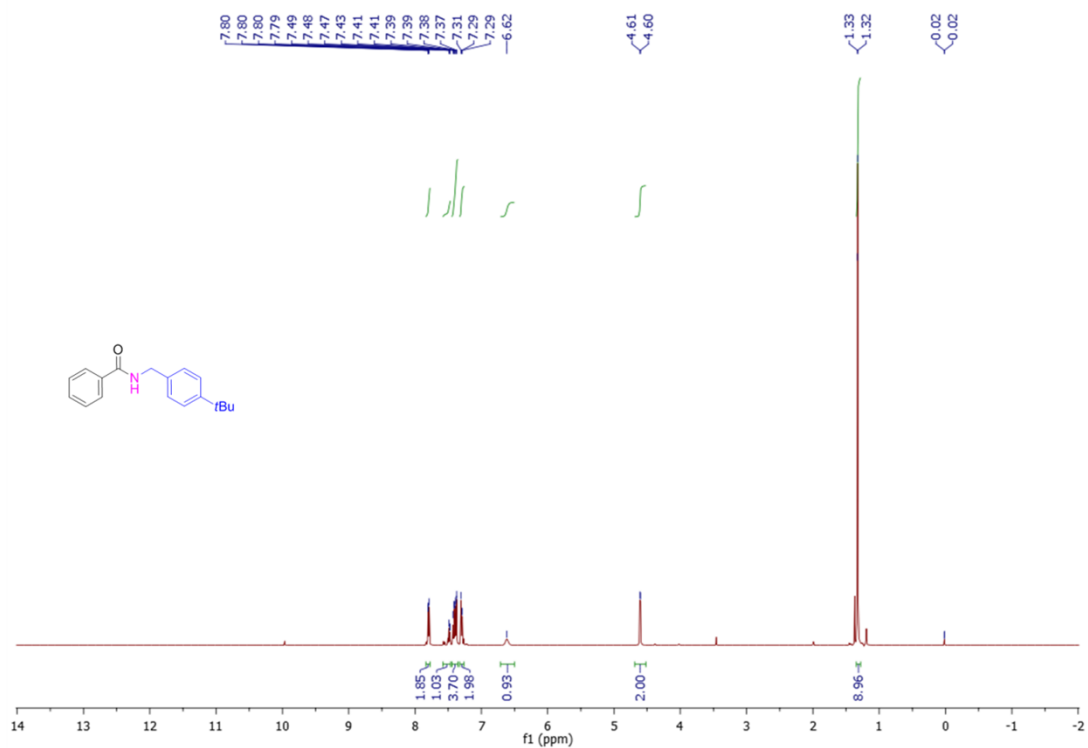

### *N*-(2-methoxybenzyl)benzamide (6ad) <sup>1</sup>H NMR

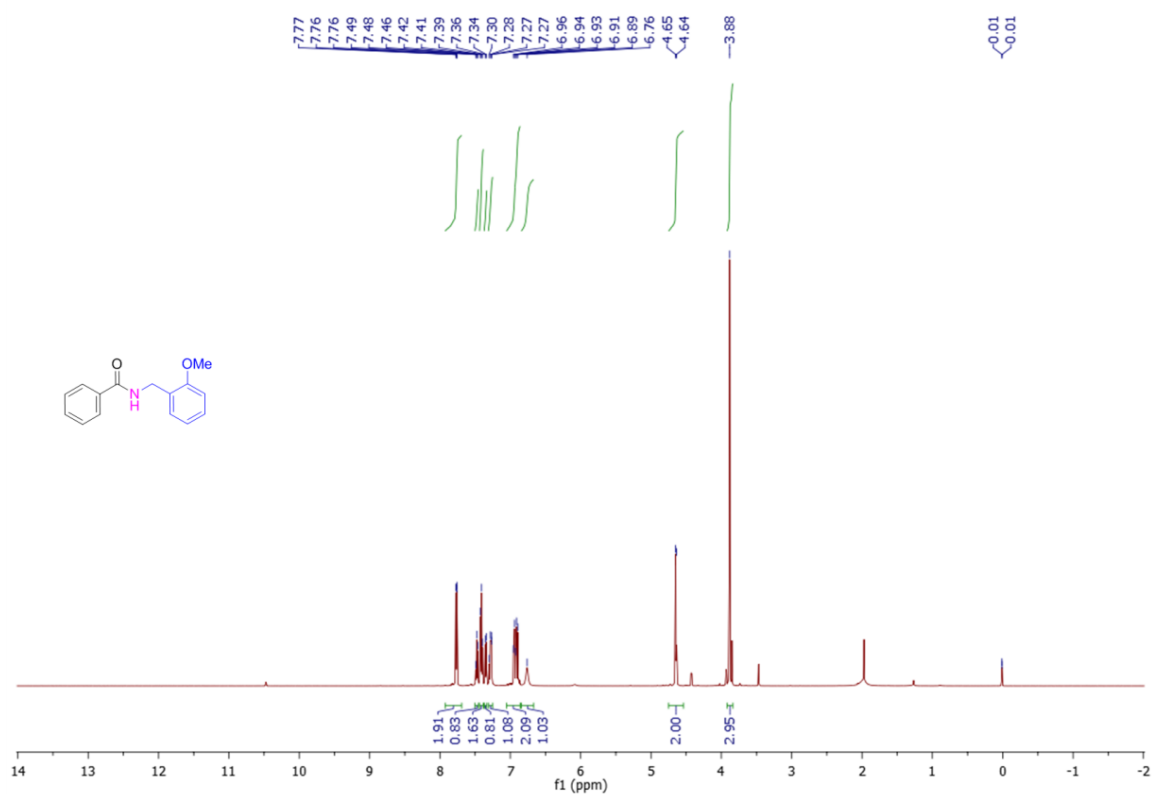

### *N*-(benzo[d][1,3]dioxol-5-ylmethyl)benzamide (6ae) <sup>1</sup>H NMR

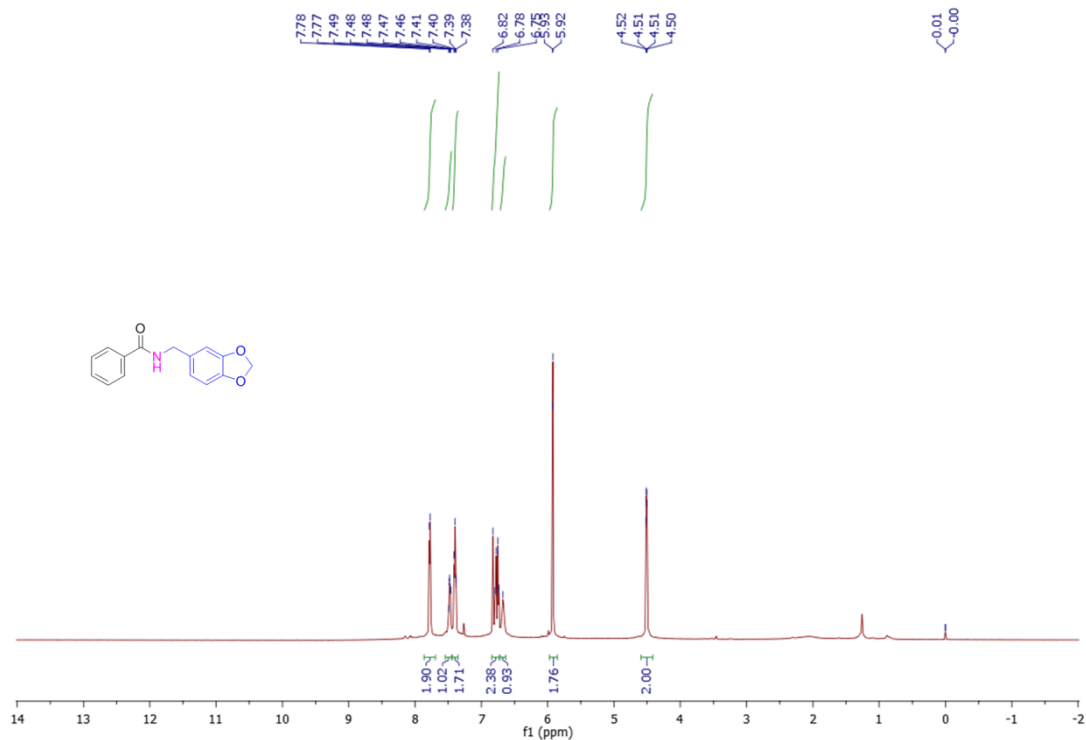

### *N*-(3-chlorobenzyl)benzamide (6ag) <sup>1</sup>H NMR

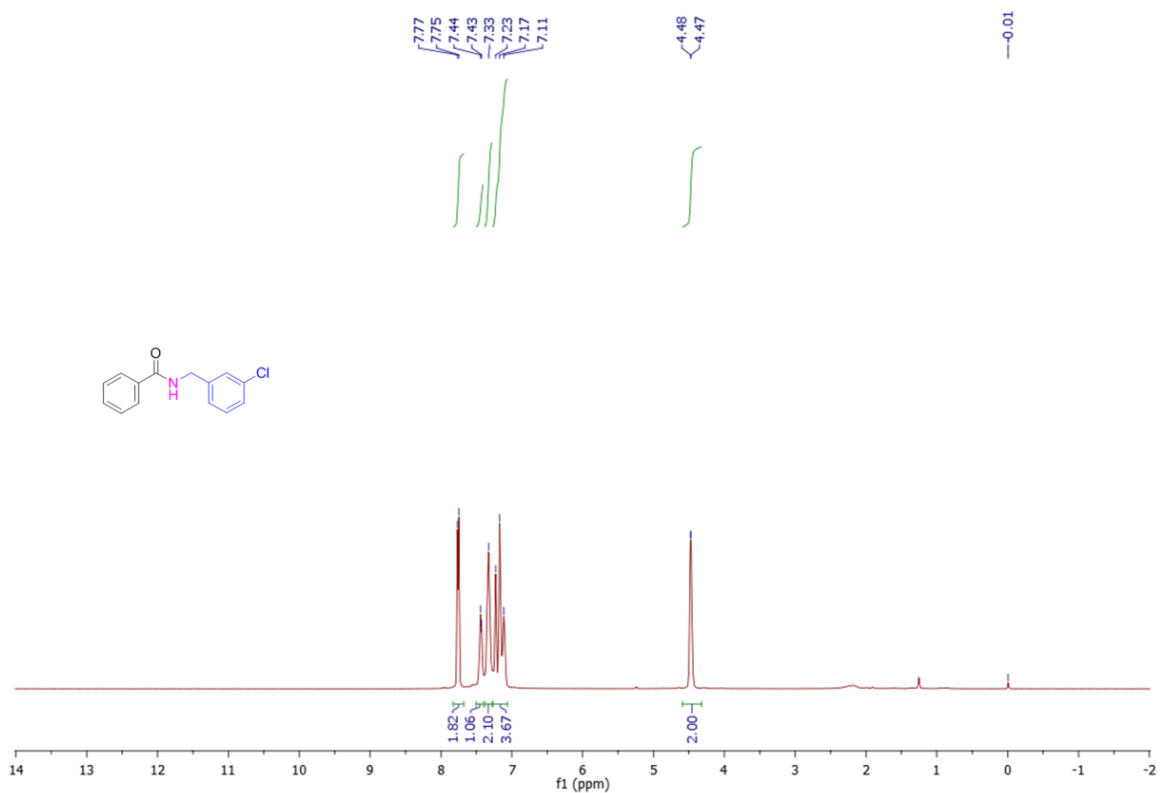

### *N*-(3-chlorobenzyl)benzamide (6ag) <sup>13</sup>C NMR

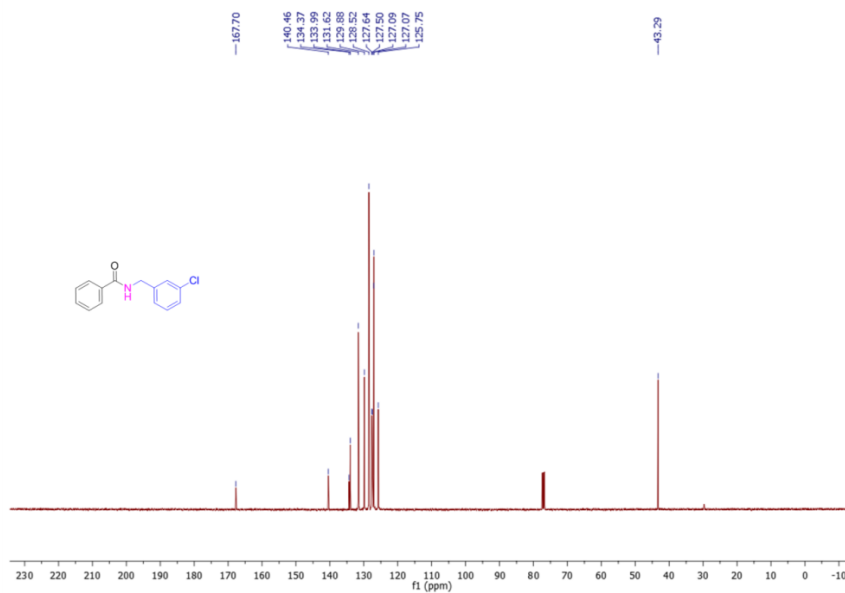

### *N*-(4-cyanobenzyl)benzamide (6ah) <sup>1</sup>H NMR

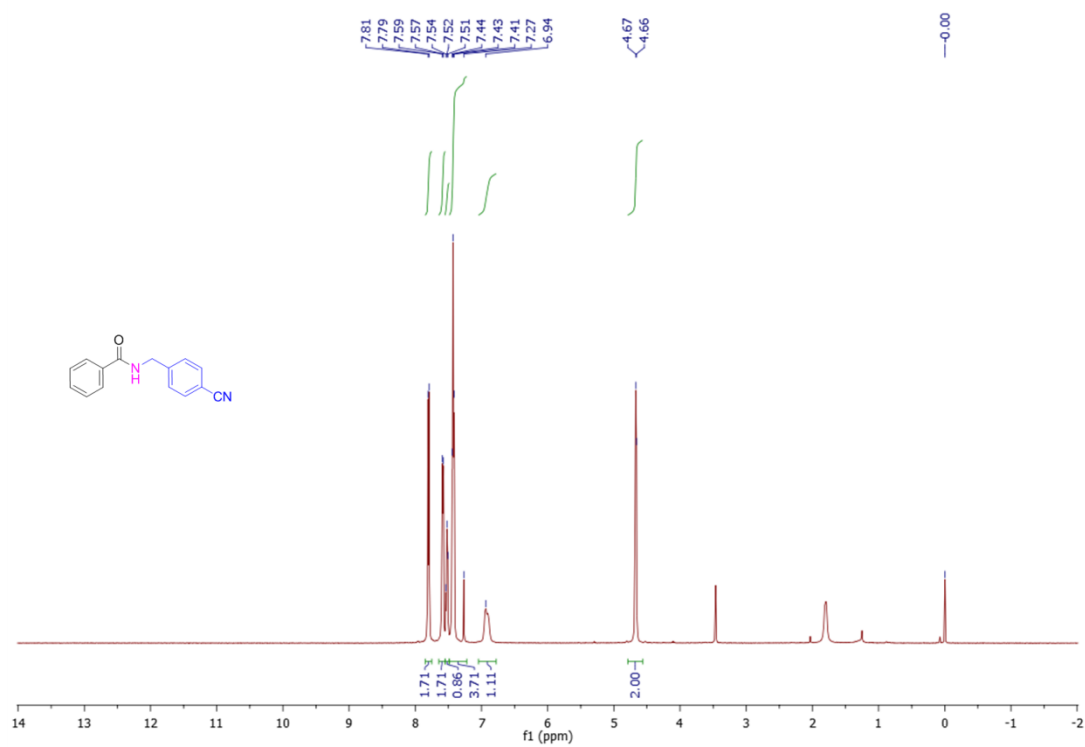



## 2-phenylisoindoline-1,3-dione (9aa) $^1\text{H}$ NMR

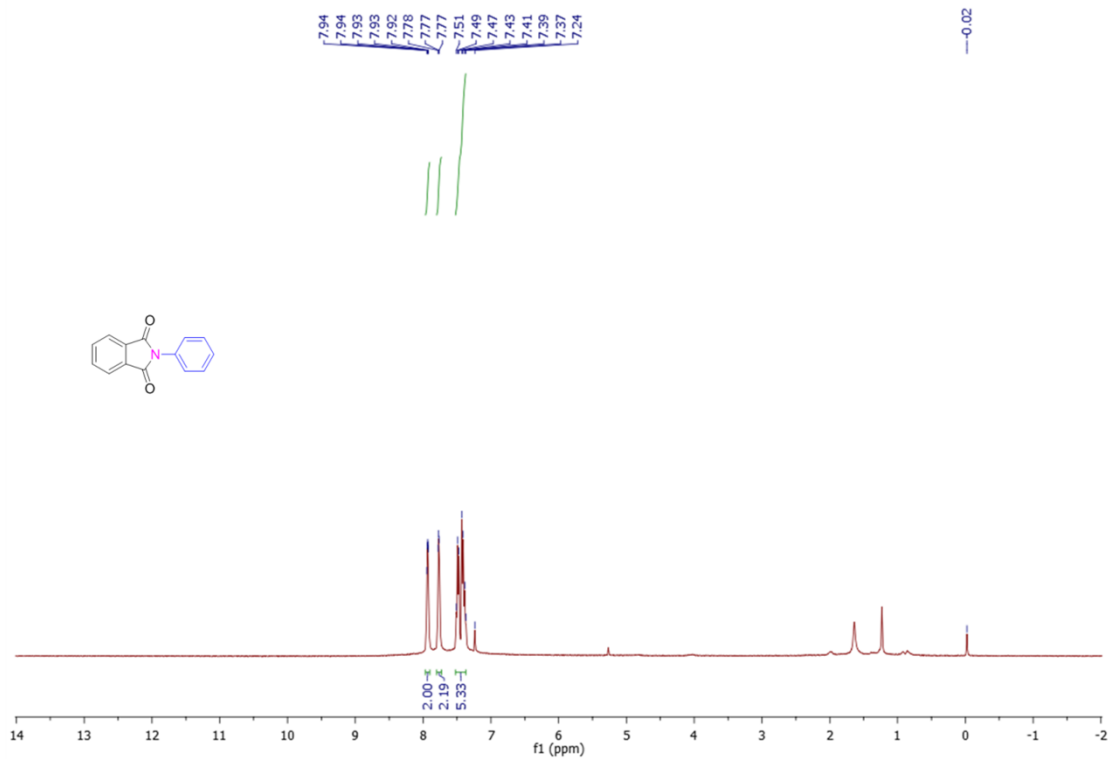

## 2-phenylisoindoline-1,3-dione (9aa) $^{13}\text{C}$ NMR

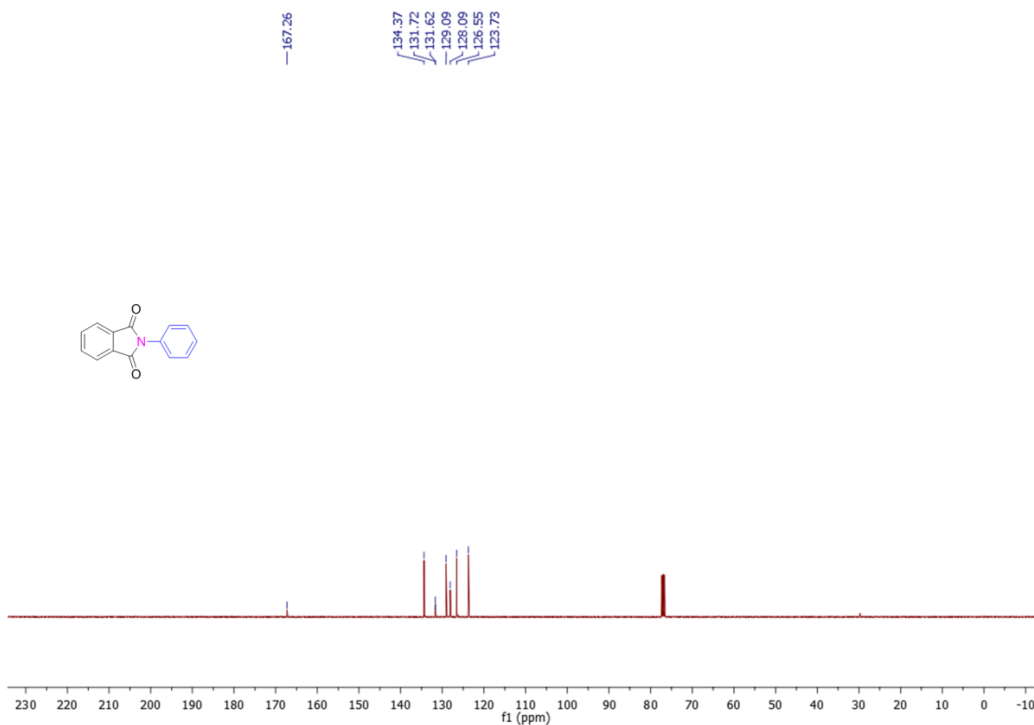

## 2-(*p*-tolyl)isoindoline-1,3-dione (9ab) <sup>1</sup>H NMR

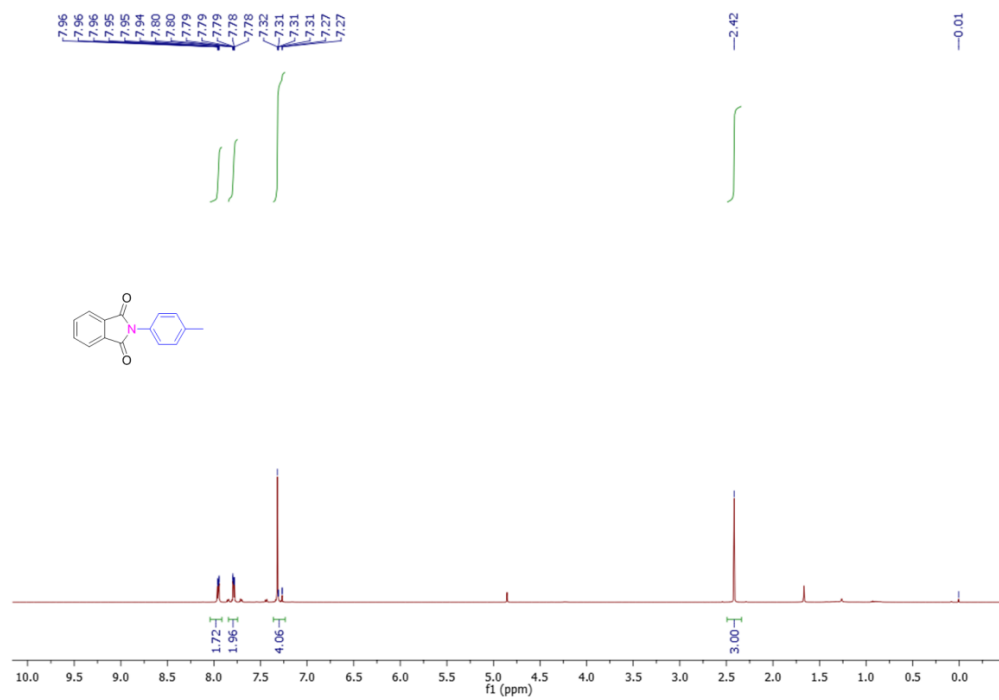

## 2-(*p*-tolyl)isoindoline-1,3-dione (9ab) <sup>13</sup>C NMR

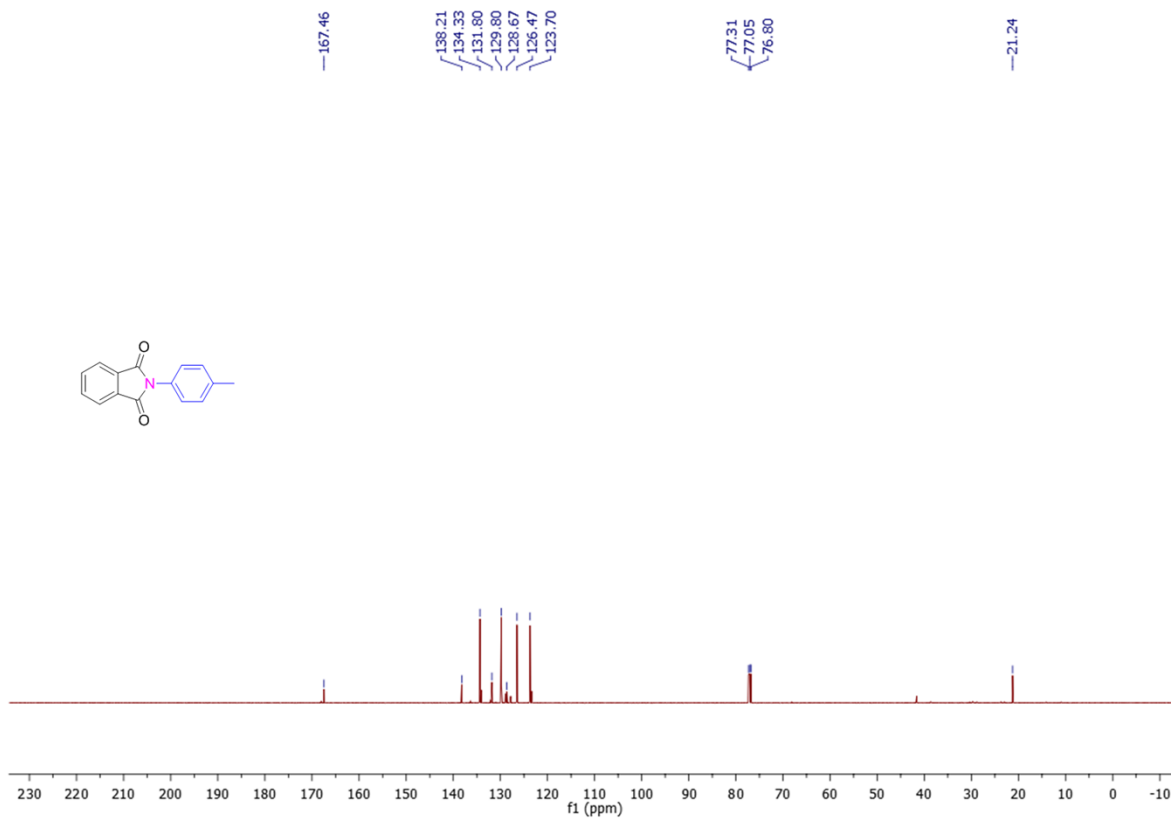

## 2-(4-methoxyphenyl)isoindoline-1,3-dione (9ac) $^1\text{H}$ NMR

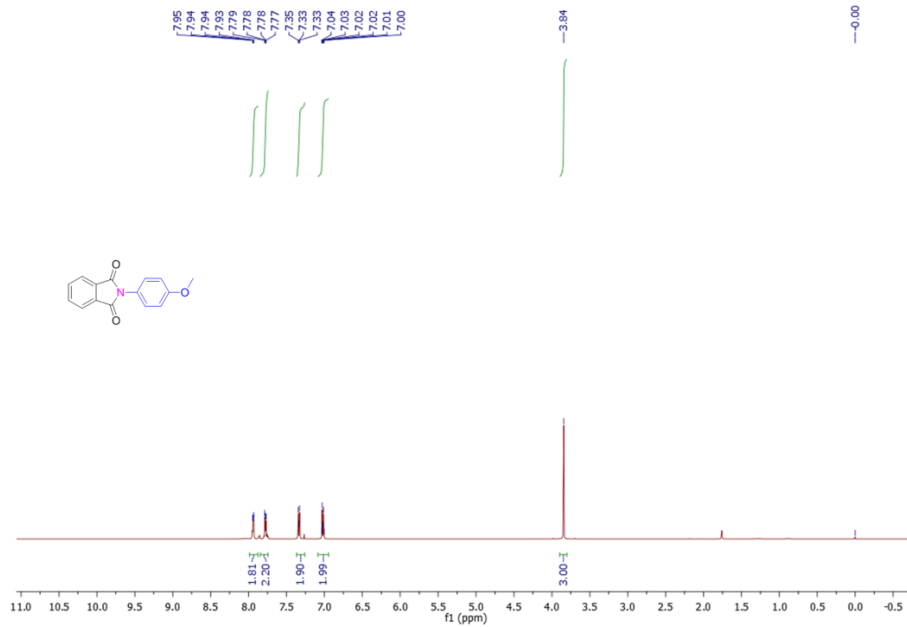

## 2-(4-methoxyphenyl)isoindoline-1,3-dione (9ac) $^{13}\text{C}$ NMR

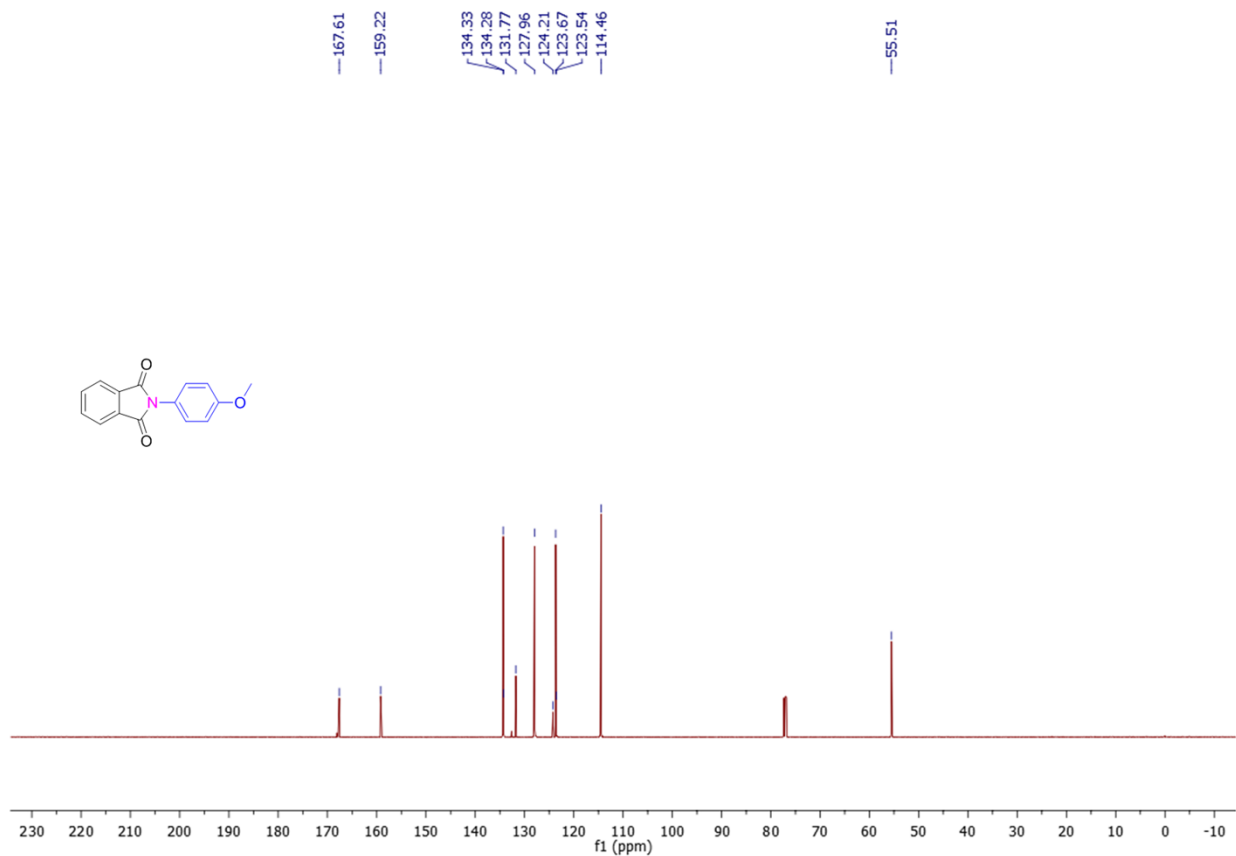

## 2-(3-methoxyphenyl)isoindoline-1,3-dione (9ad) <sup>1</sup>H NMR

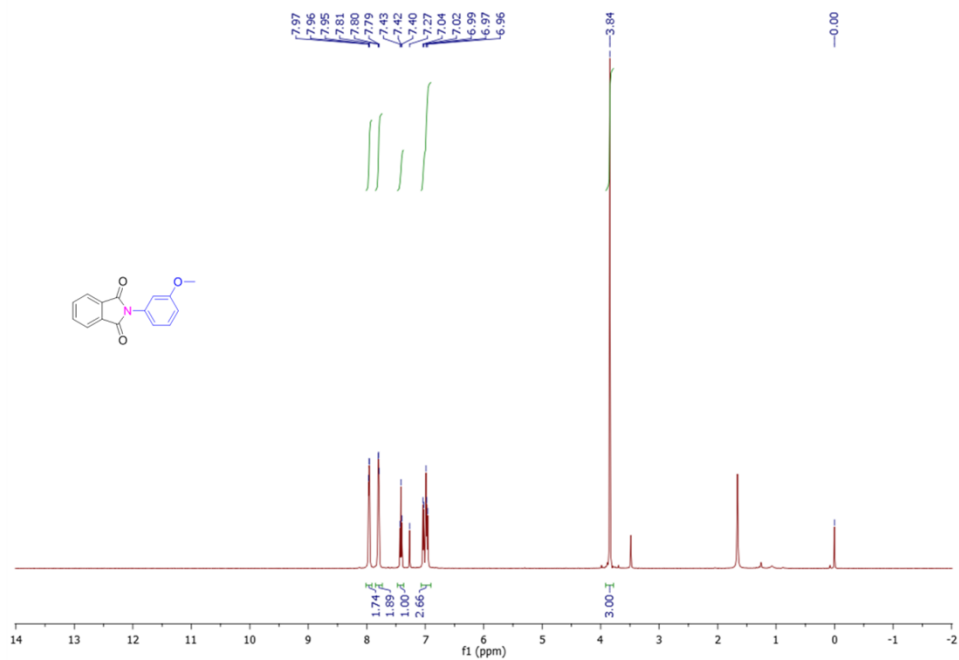

## 2-(2-methoxyphenyl)isoindoline-1,3-dione (9ae) <sup>1</sup>H NMR

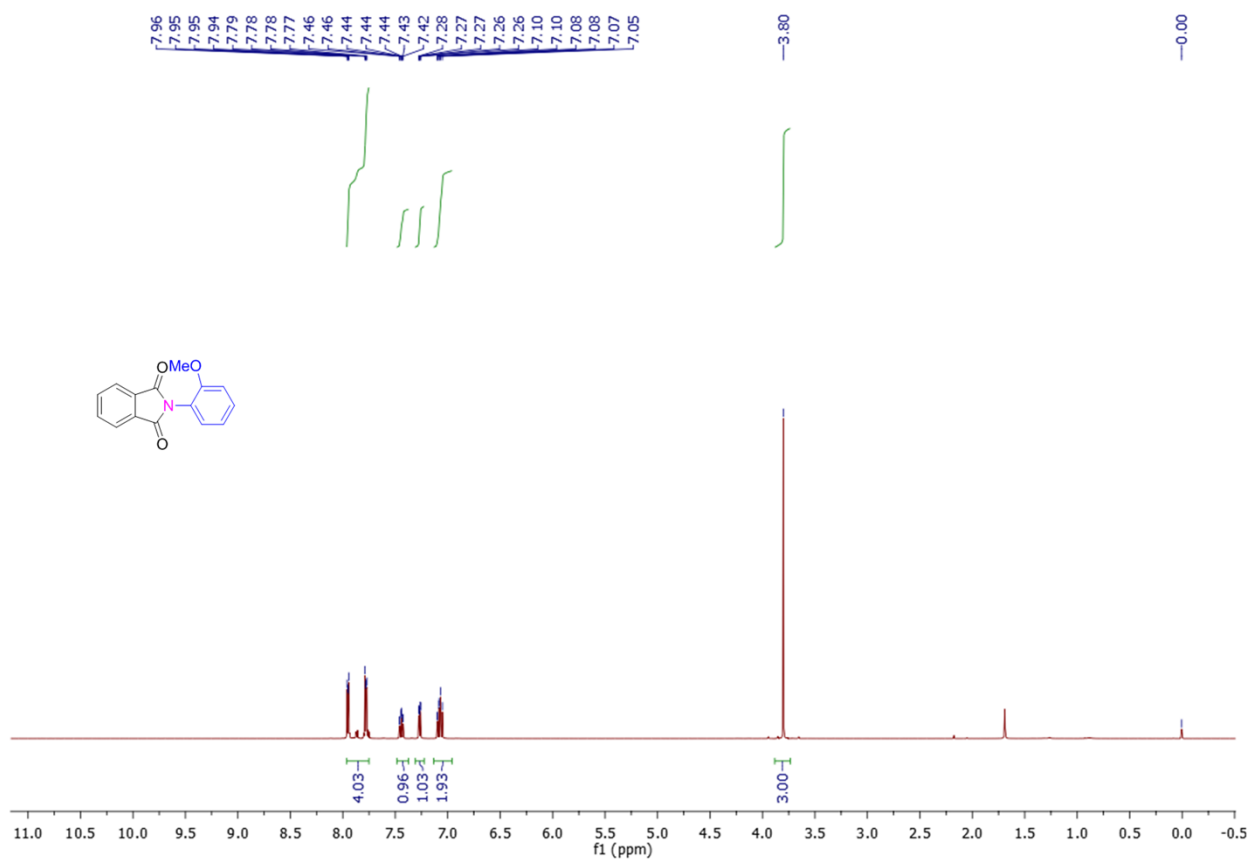

## 2-(2-methoxyphenyl)isoindoline-1,3-dione (9ae) <sup>13</sup>C NMR

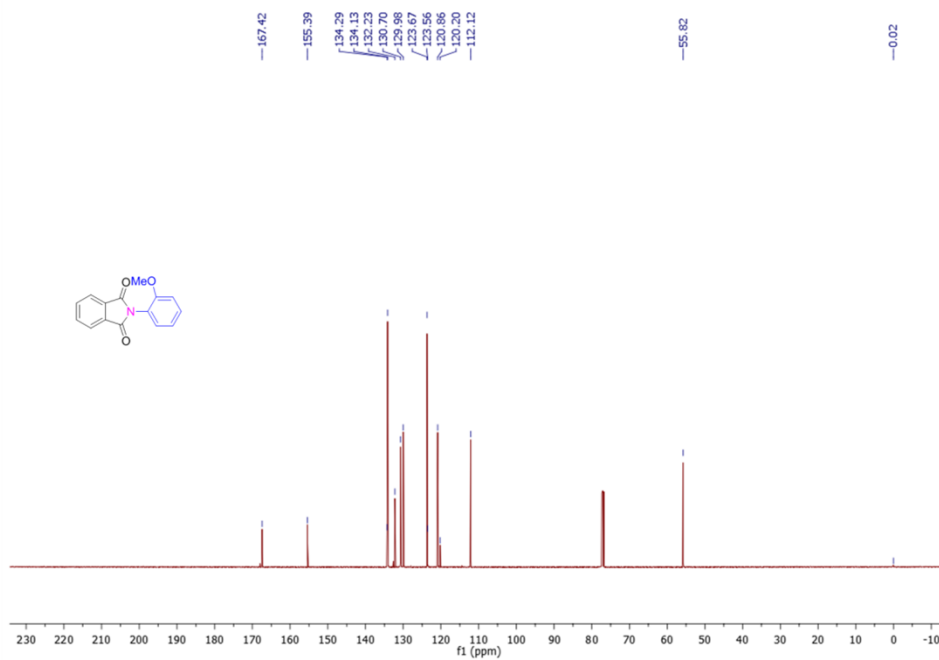

## 2-mesitylisoinoline-1,3-dione (9af) <sup>1</sup>H NMR

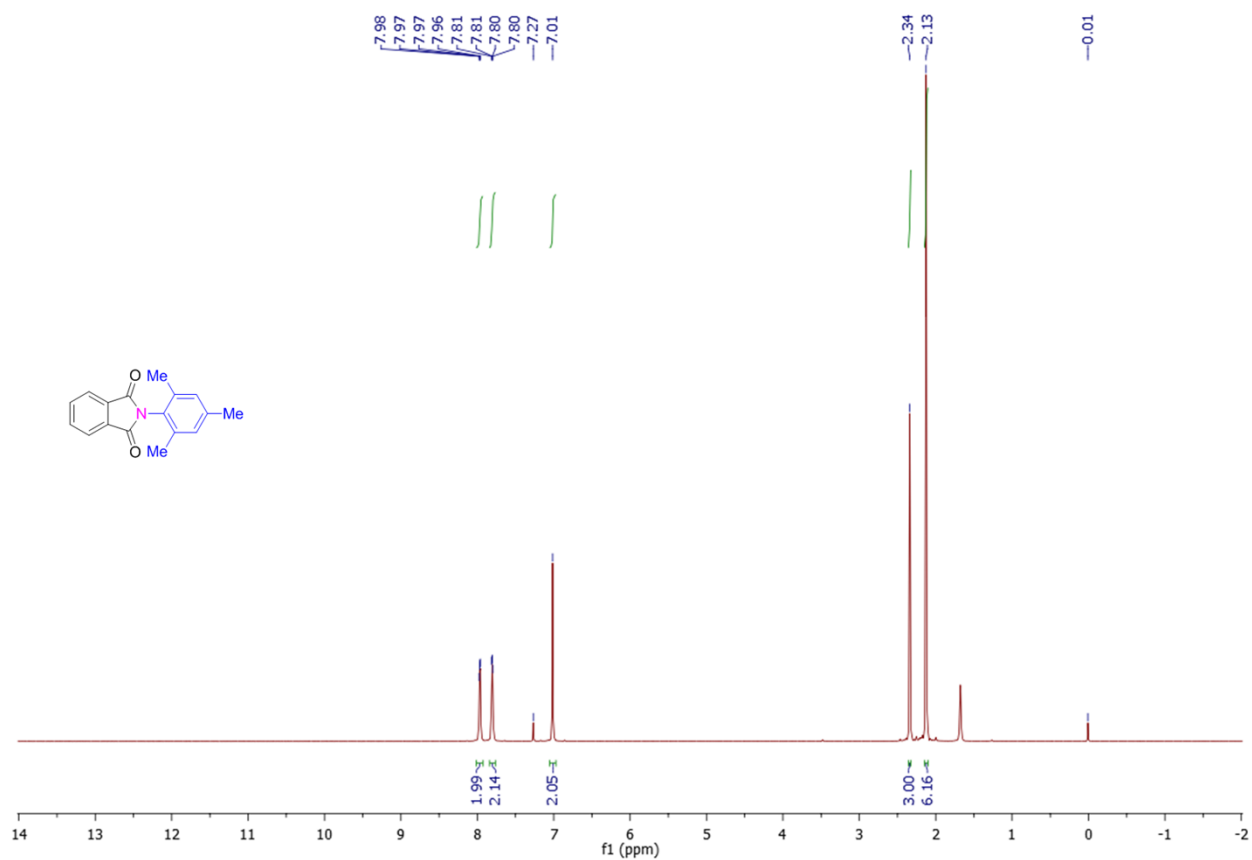

### 2-(2-fluorophenyl)isoindoline-1,3-dione (9ag) <sup>1</sup>H NMR

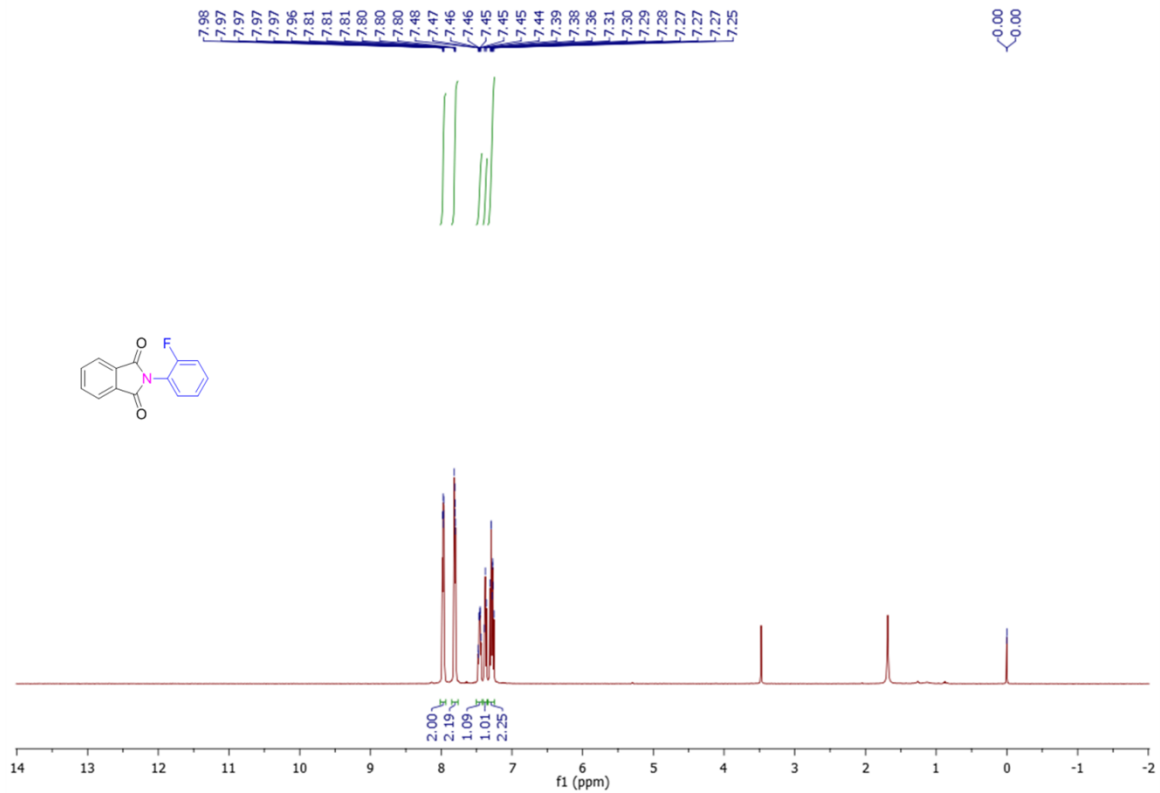

### 2-benzylisoindoline-1,3-dione (9ah) <sup>1</sup>H NMR

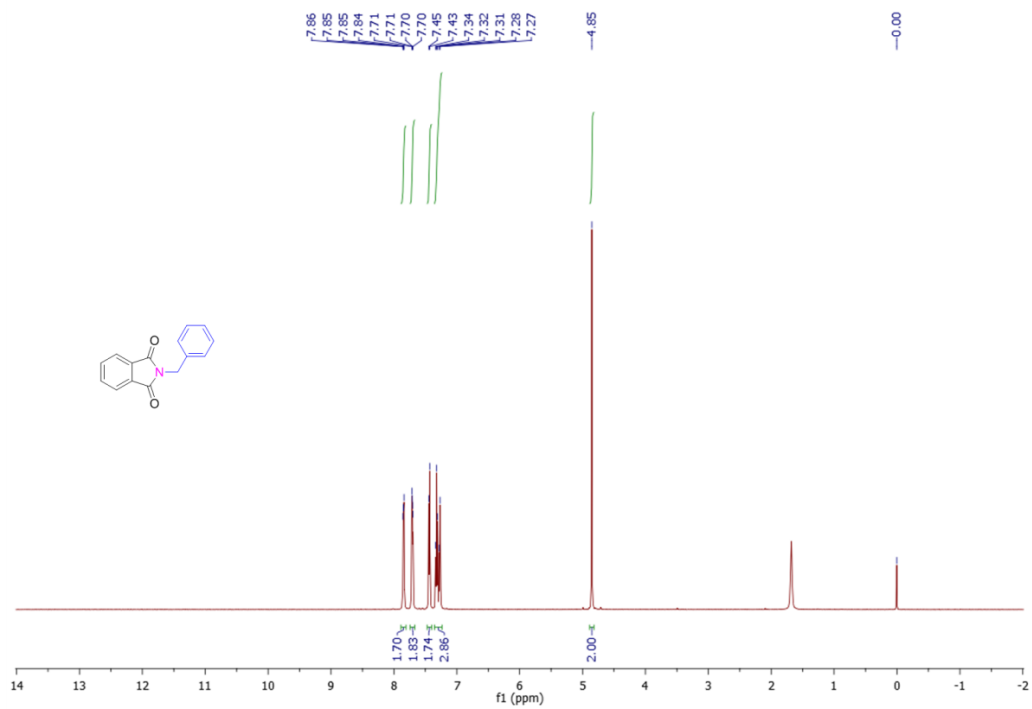

### 2-(4-(*tert*-butyl)benzyl)isoindoline-1,3-dione (9ai) <sup>1</sup>H NMR

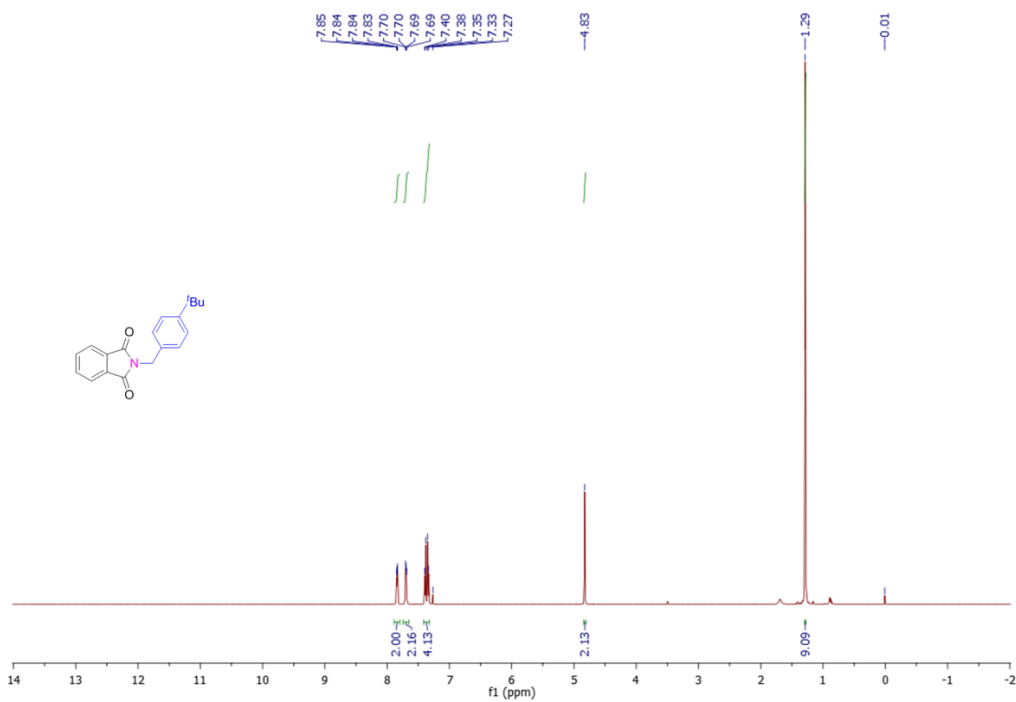

### 2-(4-methoxybenzyl)isoindoline-1,3-dione (9aj) <sup>1</sup>H NMR

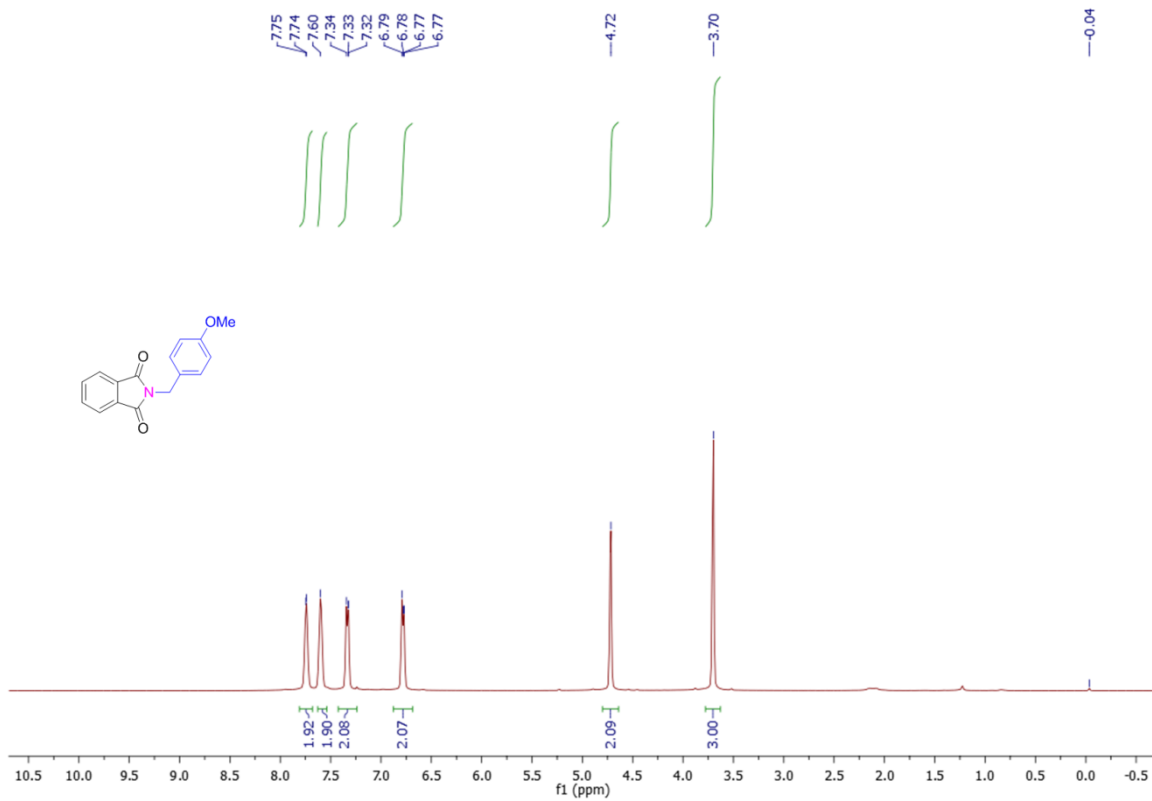

## 2-(4-methoxybenzyl)isoindoline-1,3-dione (9aj) <sup>13</sup>C NMR

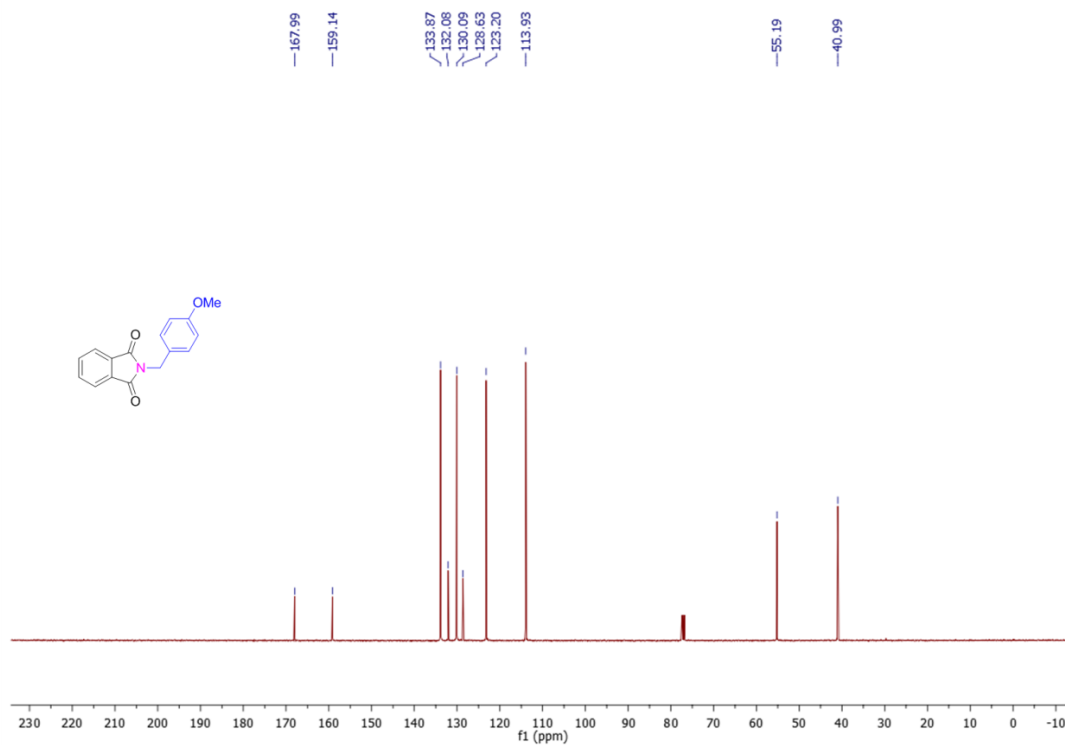

## 2-(2-methoxybenzyl)isoindoline-1,3-dione (9ak) <sup>1</sup>H NMR

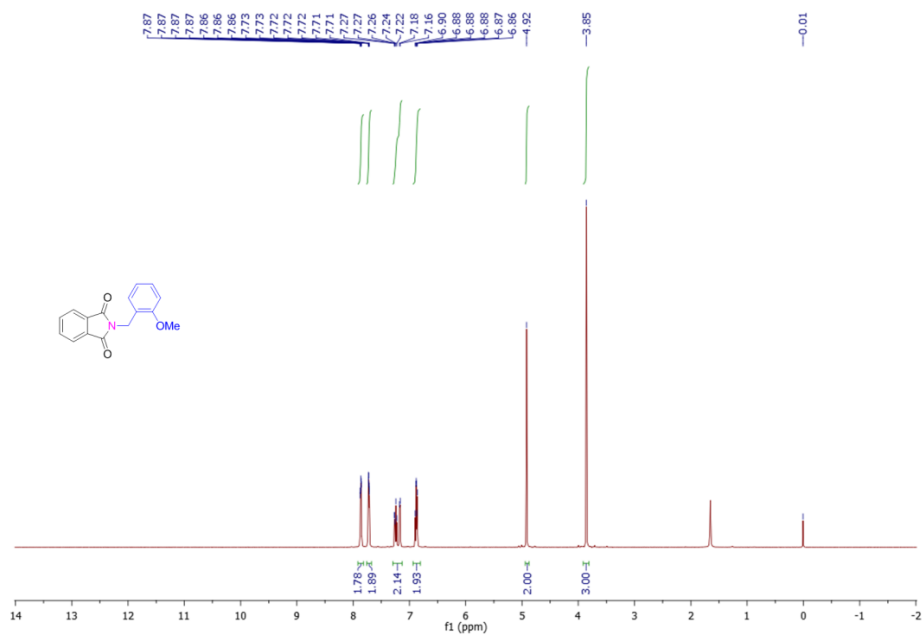



### 2-(benzo[d][1,3]dioxol-5-ylmethyl)isoindoline-1,3-dione (9a) <sup>1</sup>H NMR

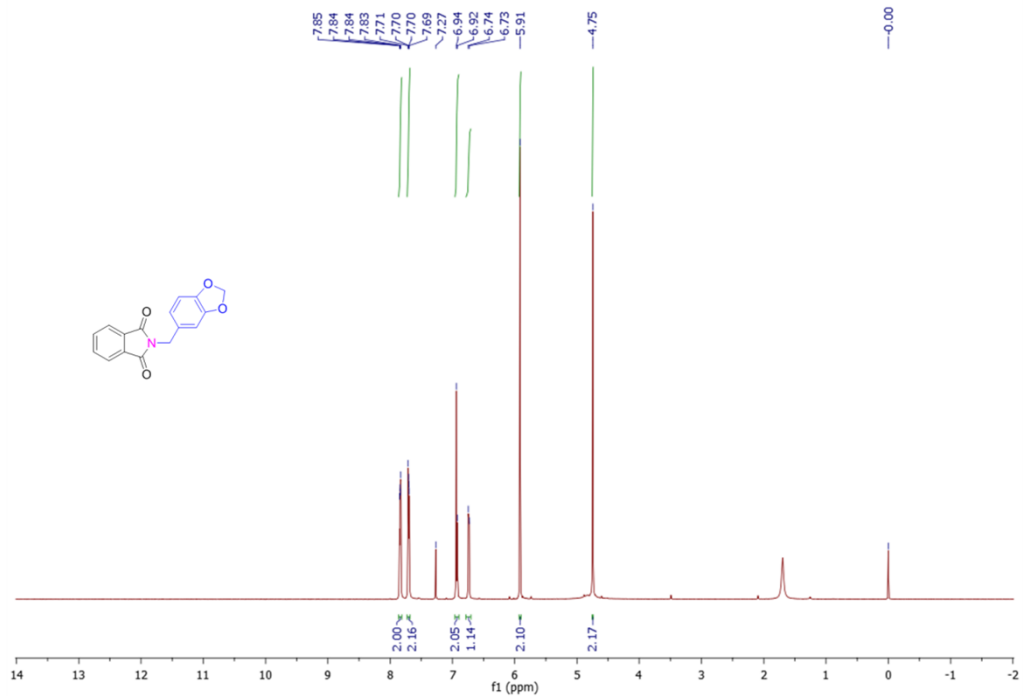

### 2-(4-fluorobenzyl)isoindoline-1,3-dione (9an) <sup>1</sup>H NMR

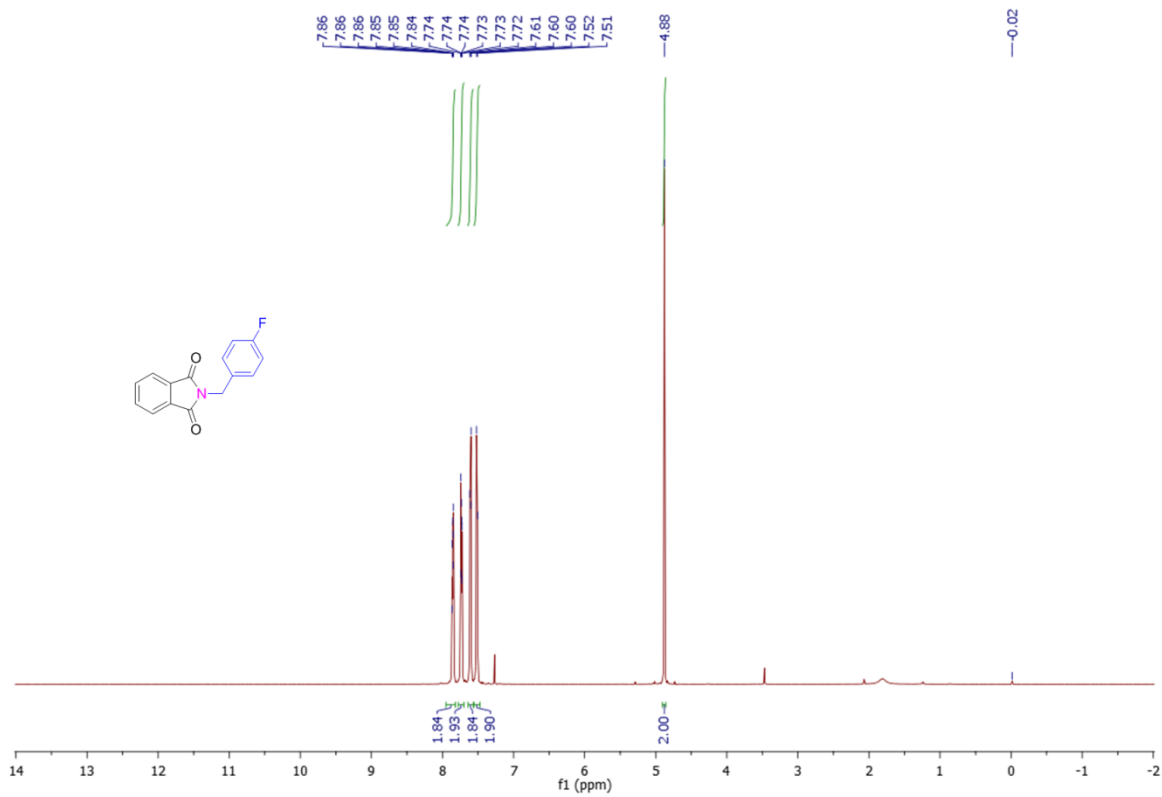

# 4-((1,3-dioxisoindolin-2-yl)methyl)benzotrile (9ao) <sup>1</sup>H NMR

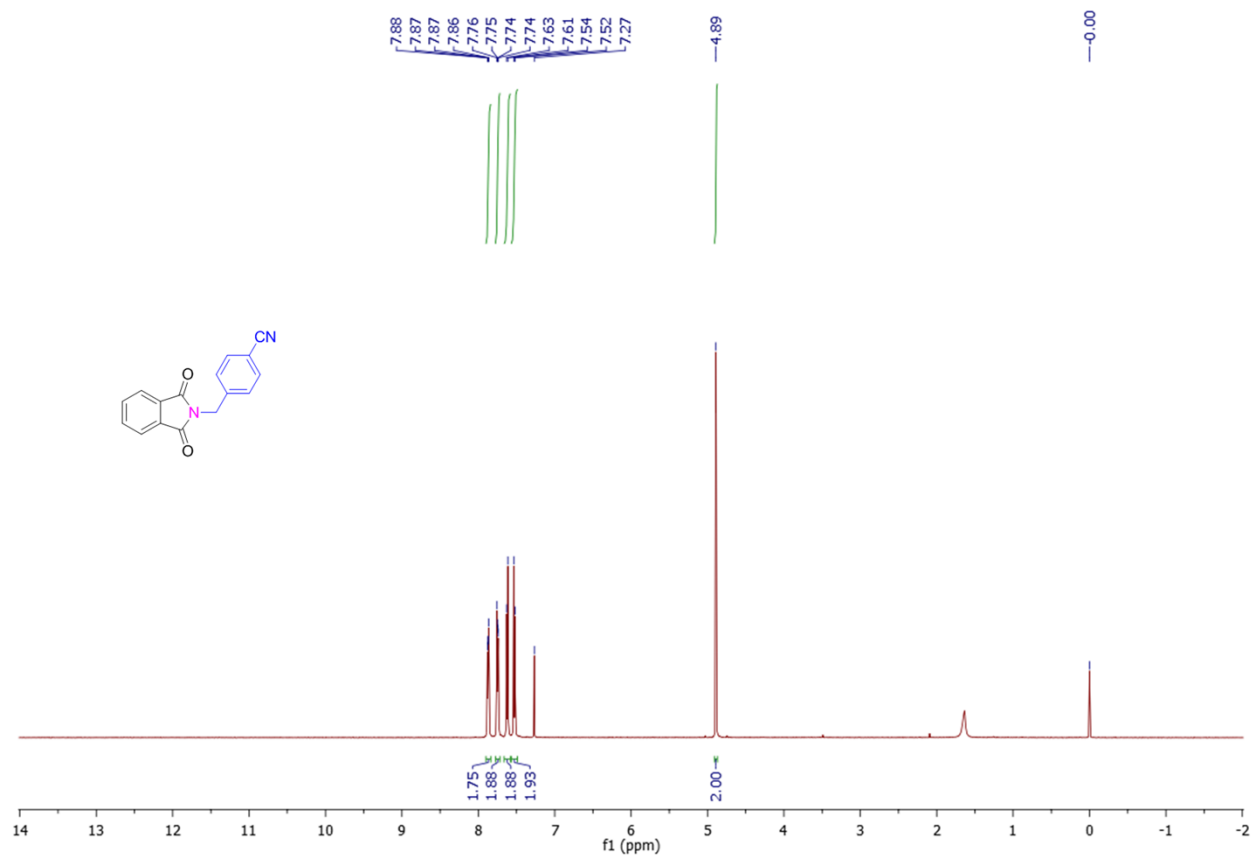

Supplement: c5ra13094h1.pdf [file c5ra13094h1.pdf]
